1 **Improved RNA stability estimation through Bayesian modeling reveals most**  
2 **bacterial transcripts have sub-minute half-lives**

3  
4 Laura Jenniches<sup>1</sup>, Charlotte Michaux<sup>2</sup>, Sarah Reichardt<sup>1</sup>, Jörg Vogel<sup>1,2,3</sup>, Alexander J.  
5 Westermann<sup>1,2</sup>, Lars Barquist<sup>1,3,\*</sup>

6  
7 <sup>1</sup> Helmholtz Institute for RNA-based Infection Research (HIRI), Helmholtz Centre for Infection  
8 Research (HZI), Würzburg, Germany

9 <sup>2</sup> University of Würzburg, Institute of Molecular Infection Biology (IMIB), Würzburg, Germany

10 <sup>3</sup> University of Würzburg, Faculty of Medicine, Würzburg, Germany

11

12 \*Correspondence to LB: [lars.barquist@helmholtz-hiri.de](mailto:lars.barquist@helmholtz-hiri.de)

13

14 **Abstract (250/250 words)**

15 RNA decay is a crucial mechanism for regulating gene expression in response to environmental  
16 stresses. In bacteria, RNA-binding proteins (RBPs) are known to be involved in post-  
17 transcriptional regulation, but their global impact on RNA half-lives has not been extensively  
18 studied. To shed light on the role of the major RBPs ProQ and CspC/E in maintaining RNA  
19 stability, we performed RNA sequencing of *Salmonella enterica* over a time course following  
20 treatment with the transcription initiation inhibitor rifampicin (RIF-seq) in the presence and  
21 absence of these RBPs. We develop a hierarchical Bayesian model that corrects for  
22 confounding factors in rifampicin RNA stability assays and enables us to identify differentially  
23 decaying transcripts transcriptome-wide. Our analysis revealed that the median RNA half-life in  
24 *Salmonella* in early stationary phase is less than 1 minute, a third of previous estimates. We  
25 found that over half of the 500 most long-lived transcripts are bound by at least one major RBP,  
26 suggesting a general role for RBPs in shaping the transcriptome. Integrating differential stability  
27 estimates with CLIP-seq revealed that approximately 30% of transcripts with ProQ binding sites  
28 and more than 40% with CspC/E binding sites in coding or 3' untranslated regions decay  
29 differentially in the absence of the respective RBP. Analysis of differentially destabilized  
30 transcripts identified a role for both proteins in the control of respiration, and for ProQ in the  
31 oxidative stress response. Our findings provide new insights into post-transcriptional regulation  
32 by ProQ and CspC/E, and the importance of RBPs in regulating gene expression.

33

34 **Significance Statement (117/120 words)**

35 Together with transcription and translation, RNA decay is one of the major processes governing  
36 protein production. Here, we have developed a new statistical approach that corrects for  
37 confounding effects when estimating RNA decay rates from RNA-seq in bacteria. Our more  
38 accurate decay rate estimates indicate that bacterial transcripts have half-lives about three  
39 times shorter than previously thought. This approach allowed us to measure the effects of RNA-  
40 binding proteins (RBPs) on decay rates, identifying large cohorts of transcripts with changes in  
41 stability following RBP deletion and conditions where post-transcriptional regulation affects  
42 survival. Our method should lead to a reevaluation of RNA stability estimates across diverse  
43 bacteria and new insights into the role of RBPs in shaping the transcriptome.

## 44 Introduction

45  
46 Rapid adaptation of the proteome to environmental conditions is essential for the survival of  
47 microorganisms. RNA degradation is an important post-transcriptional process directly  
48 influencing protein abundance. The lifetime of bacterial RNA ranges from seconds to an hour (1)  
49 and depends on numerous factors, including transcript identity, genotype and growth condition  
50 (2). RNA-binding proteins (RBPs) in bacteria include structural components of the ribosome and  
51 global post-transcriptional regulators such as Hfq (3, 4) and CsrA (5) which play key roles in  
52 modulating translation and RNA stability in concert with a network of small RNAs (sRNAs) (6,  
53 7). Beyond these model RBPs, recent years have seen the discovery of a menagerie of  
54 bacterial RBPs that bind hundreds or even thousands of transcripts (8–10), though their  
55 functions in shaping the transcriptome remain unclear.

56 In *Salmonella enterica* serovar Typhimurium (henceforth *Salmonella*), these global RBPs  
57 include the FinO-domain containing protein ProQ and the cold-shock proteins CspC and CspE.  
58 ProQ has been shown to bind hundreds of mRNAs and sRNAs (11–13), affecting important  
59 biological processes including expression of virulence factors (14) and formation of antibiotic  
60 persisters (15). CspC and CspE have been shown to play partially redundant roles in virulence,  
61 affecting survival in mice, motility, biofilm formation, and survival of bile stress (16, 17). The  
62 molecular details of how these RBPs affect phenotype are not clear, although at least some of  
63 the effects of ProQ and CspC/E are mediated by the direct modulation of mRNA stability. For  
64 instance, CspC/E have been shown to stabilize the mRNA of the bacteriolytic lipoprotein EcnB  
65 by blocking digestion by the endonuclease RNase E (16). ProQ on the other hand appears to  
66 preferentially bind 3' UTRs where in a few cases it has been shown to protect transcripts from  
67 exonuclease activity (12, 18).

68 While these results provide hints at the mechanisms by which RBPs regulate target  
69 gene expression, in the absence of transcriptome-wide differential RNA stability measurements  
70 it remains unclear how common regulation through stability modulation is. A classical approach  
71 to study RNA stability is to halt transcription with the transcription initiation inhibitor rifampicin  
72 (19) and monitor RNA decay over time. This approach has been scaled to the whole  
73 transcriptome by combining it with microarrays (20, 21) and high-throughput sequencing (22).  
74 However, the presence of non-linear effects in the resulting time-course data makes inference  
75 of differences in decay rates between experimental conditions difficult.

76 RNA-seq analysis tools such as limma (23), edgeR (24), and DESeq (25) solve the  
77 problem of accurately estimating dispersion in experiments with many measurements but few

78 replicates through an empirical Bayes approach (26). In empirical Bayes, information is pooled  
79 across transcripts under the assumption that transcripts with similar concentrations will exhibit  
80 similar biological and technical variation across samples, leading to more robust dispersion  
81 estimates. However, these tools are currently limited to linear models. Recent progress in the  
82 optimization of sampling methods has made the development of fully Bayesian hierarchical  
83 models increasingly efficient and accessible. In particular, the Stan probabilistic programming  
84 language (27) separates model description from sampler implementation, allowing easy  
85 development and testing of complex hierarchical models. This provides a powerful framework  
86 for developing analysis methods for sequencing data that can accommodate complex  
87 experimental techniques.

88 Here, we investigate the effects of ProQ and CspC/E on RNA stability across the entire  
89 transcriptome, starting from a fully Bayesian analysis of rifampicin treatment followed by RNA  
90 sequencing (RIF-seq). During model development, we discovered that accounting for  
91 confounding factors in stability assays conducted after rifampicin treatment dramatically affects  
92 the inferred half-life, leading us to substantially revise estimates for average mRNA half-life in  
93 *Salmonella* to less than 1 minute, compared to previous estimates in the range of 2 to 7 minutes  
94 in the closely related species *E. coli* (20–22). We develop a hypothesis testing procedure for  
95 determining differential decay rates that allows us to identify hundreds of gene transcripts  
96 destabilized in the absence of ProQ and CspC/E. We combine our differential stability estimates  
97 with other high-throughput datasets available for *Salmonella* to further characterize RBP  
98 interactions, identifying a role for ProQ in survival of oxidative stress and for CspC/E in the  
99 control of respiration. We additionally find a substantial population of long-lived transcripts that  
100 depend on RBPs for their stability, illustrating the importance of RBPs in shaping the bacterial  
101 transcriptome. Beyond its utility in investigating RBP interactions, our improved approach to  
102 determining transcript half-life suggests that RNA stability in bacteria has generally been  
103 overestimated and will need to be reassessed in other bacterial species.

104

## 105 **Results**

106

### 107 **A progressive Bayesian analysis revises RNA half-lives**

108

109 To determine transcriptome-wide half-lives under an infection-relevant condition, we applied

110 RIF-seq to *Salmonella* at early stationary phase (ESP) where host invasion genes are

111 expressed (28). Our RIF-seq workflow for data production and analysis is illustrated in **Figure**

112 **1A**: wild-type and isogenic RBP deletion strains were treated with rifampicin, and cellular RNA

113 samples were collected over time to capture RNA decay dynamics. We collected data from  
114 eight time points following rifampicin treatment in three ( $\Delta cspC/E$ ), six ( $\Delta proQ$ ), or nine (wild-  
115 type) replicates (see Methods). We included ERCC RNA spike-ins (29) for normalization  
116 between samples. Additionally, we developed a center-mean normalization technique to remove  
117 batch effects between replicate samples (**Figure S2**; *Methods*). Subsequently, we fitted a  
118 Bayesian statistical model to the normalized data using Hamiltonian Monte Carlo with Stan (27).

119 We employed a progressive Bayesian workflow to arrive at our final model (**Figure 1B**).  
120 An advantage of Bayesian analysis is that it allows the modeler to formalize their beliefs about  
121 the data generating process and provides a variety of tools for model comparison and selection.  
122 In the case of RIF-seq data, the simplest expectation would be that RNA concentrations would  
123 exhibit a linear decay on a semilog scale, which could be fit by a simple linear model with gene-  
124 and condition-dependent decay rate  $\beta$ . While some of our observations met this expectation  
125 (**Figure S3A**), the vast majority of transcripts exhibited more complex dynamics that prevent  
126 accurate extraction of decay rates with a linear model (**Figure 1C**; **S3A**), leading to large  
127 unexplained variation at late time points (**Figure S3K**). To account for this, we introduced  
128 additional parameters that capture confounding effects in the data. The first confounding effect  
129 is a gene-dependent delay parameter  $\gamma$ , which captures the delay commonly observed in RIF-  
130 seq data before decay initiates (**Figure 1B&C**, in green). As has been previously described, this  
131 is due to ongoing transcription from RNA polymerase already bound to DNA, which rifampicin  
132 does not block (22, 30). The ongoing transcription compensates for decay, manifesting as a  
133 delayed decay. To support the relationship between ongoing transcription and the delay  
134 parameter, we performed an analysis of elongation times on 60 base sub-genic windows,  
135 finding a clear association between the estimated elongation time and distance to annotated  
136 transcription start sites (**Figure S3B**). We used this association to infer transcription rates from  
137 our data set (see **Figure S3C**, Methods) finding a median transcription rate of 22.2 nt/s (**Figure**  
138 **S3D**), comparable to previous estimates in *E. coli* (22).

139 The second confounding effect we corrected for was an apparent gene- and condition-  
140 dependent baseline RNA concentration  $\pi$  beyond which no further decay was observed (**Figure**  
141 **1B&C**, orange). We were initially concerned that this effect may be an artifact of the  
142 pseudocount we used to avoid dividing by zero in our calculations; however, inspection of a  
143 number of decay curves illustrated that the observed baseline was generally well above the  
144 detection threshold (**Figure S3E**, see Methods). We also verified that the half-life of a transcript  
145 is generally constant along an operon (**Figure S3G**). In agreement with previous work (31) we  
146 found a small number of stable subregions which generally corresponded to known sRNAs, but

147 since this was not a general feature of transcripts we excluded this as a source of the observed  
148 baseline. To confirm that the baseline is not a result of our sequencing protocol, we used  
149 independent northern blot quantifications from a rifampicin treatment time course including late  
150 time points from a previous study (11). These quantifications reproduced the observed baseline  
151 effect (**Figure 1D**), illustrating that this is a general feature of rifampicin RNA stability assays.  
152 For wild-type *Salmonella*, we find that a median of 2.6% of the initial transcript concentration  
153 appears resistant to decay (**Figure S3H**), and that the exponential decay regime ends at  
154 different timepoints for different transcripts and genotypes (**Figure S6AB&C**). Whether this  
155 fraction is truly resistant to degradation or just degrades much slower than the rest of the  
156 transcript population is unclear. However, the median fraction of baseline RNA increases to  
157 5.7% when *proQ* is overexpressed (**Figure S3H**), suggesting that nonspecific RBP-RNA  
158 interactions may play a role in degradation resistance.

159 To compare the models with and without these two confounding factors, we calculated  
160 the difference in the expected log pointwise predictive density (ELPD), a measure of the  
161 expected predictive accuracy of a model on out-of-sample data, using Pareto-smoothed  
162 importance sampling approximate leave-one-out cross-validation (PSIS-LOO, see Methods)  
163 (32). Comparing the difference in ELPD between a simple linear model, the piecewise linear  
164 model correcting only for extension time, and the full model (henceforth *log-normal* model)  
165 including the baseline correction showed a clear preference for the log-normal model,  
166 particularly at late timepoints (**Figure S3I&J**). Additionally, examination of the fitted variance  
167 unexplained by our decay model,  $\sigma_g$ , illustrated the log-normal model captured the behavior of  
168 late timepoints better than the piecewise model (**Figure S3K-M**). Correcting for confounding  
169 factors has major implications for transcriptome-wide estimates of decay rates: while the linear  
170 and piece-wise linear models produced median half-life estimates of 2.7 and 2.5 minutes,  
171 respectively, our final log-normal model estimates a median half-life of 0.9 minutes (**Figure 1E**).

172 To investigate whether transcripts encoding proteins involved in different cellular  
173 functions systematically differ in their stability, we calculated average half-lives across clusters  
174 of orthologous groups (COG) categories (33) (**Figure 1F; S5**). In agreement with previous work  
175 (20, 21), transcripts for genes involved in energy production and carbohydrate metabolism  
176 tended to be longer lived. We also found many sRNAs to have longer than average half-lives.  
177 Among the least stable transcripts were those coding for genes involved in cell division (e.g.  
178 *ftsZ*) and DNA replication (e.g. *dnaA*, *dnaN*), suggesting tight control of their cognate proteins.  
179 Taken together, accurately modeling RNA-decay curves led to drastically reduced

180 transcriptome-wide half-life estimates and allowed us to relate transcript stability to gene  
 181 function.  
 182

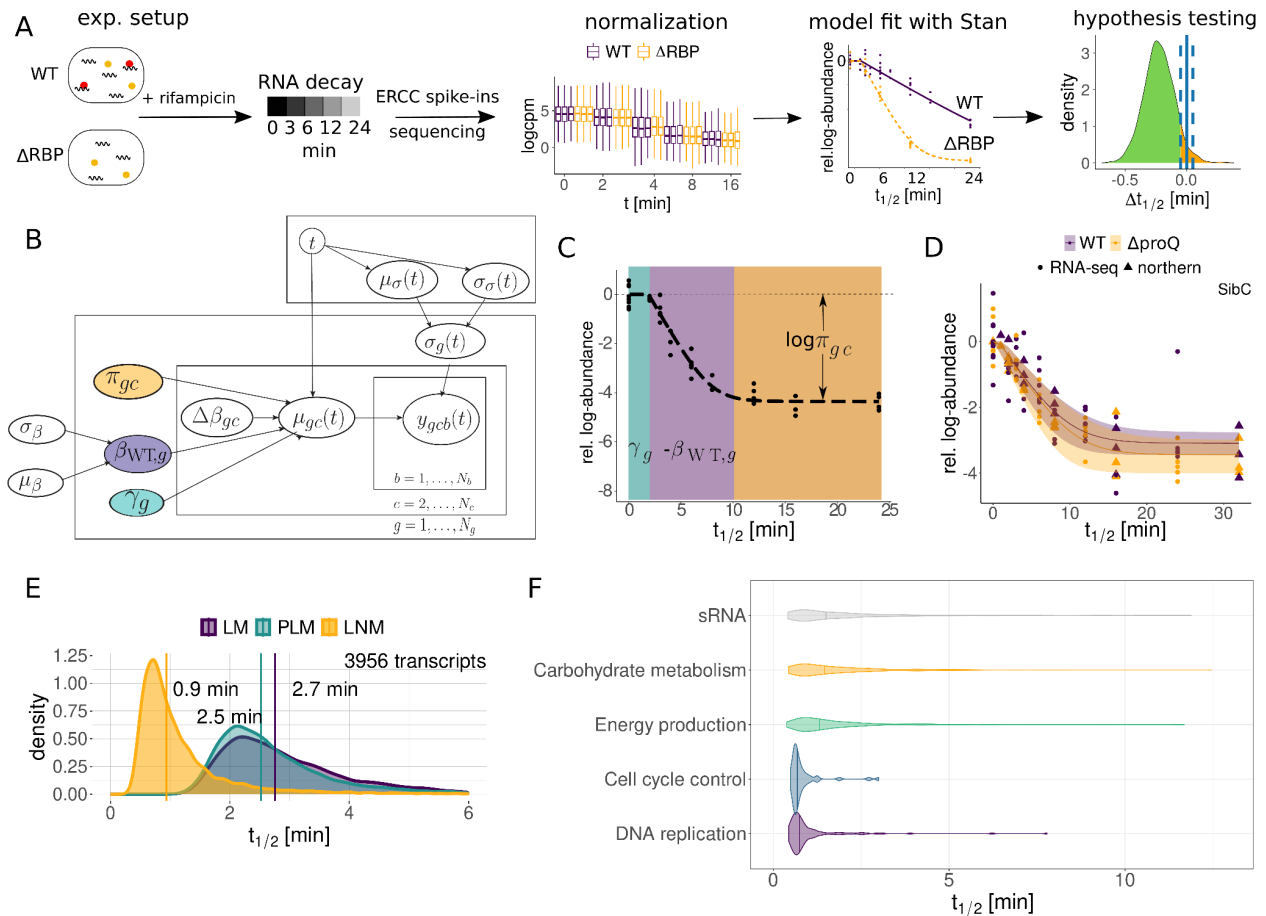

183  
 184 **Figure 1. Pipeline and model description**

185 (A) RIF-seq workflow: WT and  $\Delta$ RBP strains are treated with rifampicin, cells are harvested at various  
 186 time points and subjected to RNA-seq. Read counts are normalized before the extraction of biologically  
 187 relevant parameters with a Bayesian model. Significant differences between strains are identified with  
 188 Bayesian p values. (B) A plate diagram of the Bayesian models in this study. The layers indicate which  
 189 indices and variables the parameters depend on. The LM is parametrized by the WT decay rate  $\beta_{WT,g}$   
 190 (purple). In the PLM, the gene-wise elongation time  $\gamma_g$  (green) is added. The LNM adds a baseline  
 191 parameter  $\pi_{gc}$  (orange) which corresponds to the fraction of residual RNA ( $\pi_{gc} \in [0,0.2]$ ). The WT decay  
 192 rate  $\beta_{WT}$  is a gene-wise parameter that is modeled hierarchically and depends on the hyperparameters  
 193  $\mu_{\beta}$  and  $\sigma_{\beta}$ . The difference in decay rate  $\Delta\beta_{gc}$  depends on the strain or condition  $c$ . The scale parameter  
 194  $\sigma_g(t)$  captures variation by our decay model and depends on the time-dependent hyperparameters  $\mu_{\sigma}(t)$   
 195 and  $\sigma_{\sigma}(t)$ . (C) Representative example of a decay curve in the LNM, illustrating regimes dominated by  
 196 the different model parameters. The period of transcription elongation  $\gamma$  is marked in green, the  
 197 exponential decay with decay rate  $\beta$  in purple and the constant regime governed by the fraction of  
 198 baseline RNA  $\pi$  in orange. (D) Comparison of RNA-seq and model fit with independent northern blot  
 199 quantifications for SibC (11). (E) Hyperpriors and median of transcriptome-wide WT half-lives in the three

200 Bayesian models. (F) Half-life distributions from the log-normal model for transcripts in selected COG  
201 categories.

202  
203

## 204 **Steady-state abundance does not reflect changes in transcript half-life upon RBP** 205 **deletion**

206

207 To study the influence of the RBPs ProQ and CspC/E on transcript stability, we applied the log-  
208 normal model to our RIF-seq data for the *proQ* and *cspC/E* deletion strains, as well as a ProQ  
209 overexpression strain (ProQ++; see Methods). To prioritize transcripts with changes in stability,  
210 we developed a hypothesis testing procedure based on examination of the posterior distribution  
211 of the change in decay rate from the wild-type (**Figure S4A**) and estimated statistical  
212 significance by calculating Bayesian p-values (**Figure S4B**). Since Bayesian p-value  
213 distributions require calibration (34, 35), we used simulation studies to estimate the false  
214 discovery rate (FDR) (**Figure S4C-E**, see Methods). To evaluate our differential stability  
215 estimates, we examined known targets of ProQ and CspC/E (**Figure 2A-C, S6A**). For deletion of  
216 ProQ we were able to confirm destabilization of the *cspD*, *cspE*, and *ompD* transcripts (**Figure**  
217 **2A**), while the *cspC* transcript was hyperstabilized in the ProQ++ background (**Figure 2B**) in  
218 agreement with previous northern analysis (12). Similarly, we found the *ecnB* transcript  
219 destabilized following *cspC/E* deletion (**Figure 2C**) as previously reported (16).

220 For both RBP deletions, we identify hundreds of transcripts with changes in stability at  
221 an FDR of 0.1 (**Figure 2D&E**). Deletion of *cspC/E*, whose role in maintaining transcript stability  
222 is less well explored, led to strong destabilization of a large cohort of transcripts (727), while  
223 only stabilizing 164 (**Figure 2F**). Curiously, we identified more transcripts which were  
224 significantly stabilized (413) than destabilized (276) following *proQ* deletion (**Figure 2G**), which  
225 was unexpected as prior studies have focused on ProQ's stabilizing effect (11, 12).  
226 Nevertheless, stabilized transcripts tended to have much smaller changes in half-life, with a  
227 median change of 0.3 minutes (**Figure S6D**), compared to destabilized transcripts whose half-  
228 lives changed by 0.7 minutes on average.

229 A striking feature of our analysis of both strains was that changes in transcript half-life  
230 are not clearly related to changes in steady-state abundance upon RBP deletion (**Figure 2D-G**).  
231 In the *proQ* deletion strain, less than 10% of destabilized transcripts showed a statistically  
232 significant decrease in steady-state abundance. While this number was higher for the *cspC/E*  
233 deletion (~18%), it was still only a minor fraction of the total number of destabilized transcripts.  
234 This might be explained by altered activity of other regulatory proteins. Deletion of either RBP

235 led to perturbation of the stability of transcripts encoding major regulatory proteins including the  
 236 anti-sigma factor Rsd, the transcription termination factors Rho and NusA, the alternative sigma  
 237 factor RpoS, the nucleoid-associated HupA/B, and the cAMP receptor protein CRP (**Figure**  
 238 **S6B**). For HupA/B and RpoS, we also observed reduced mRNA abundance in RBP deletion  
 239 strains (**Figure S14**). Hence, loss of ProQ or CspC/E likely has complex, and in some cases  
 240 indirect, effects on the global transcriptome. This suggests caution should be taken when  
 241 deducing direct regulatory interactions from differential expression analysis of RBP-deletion  
 242 mutants.

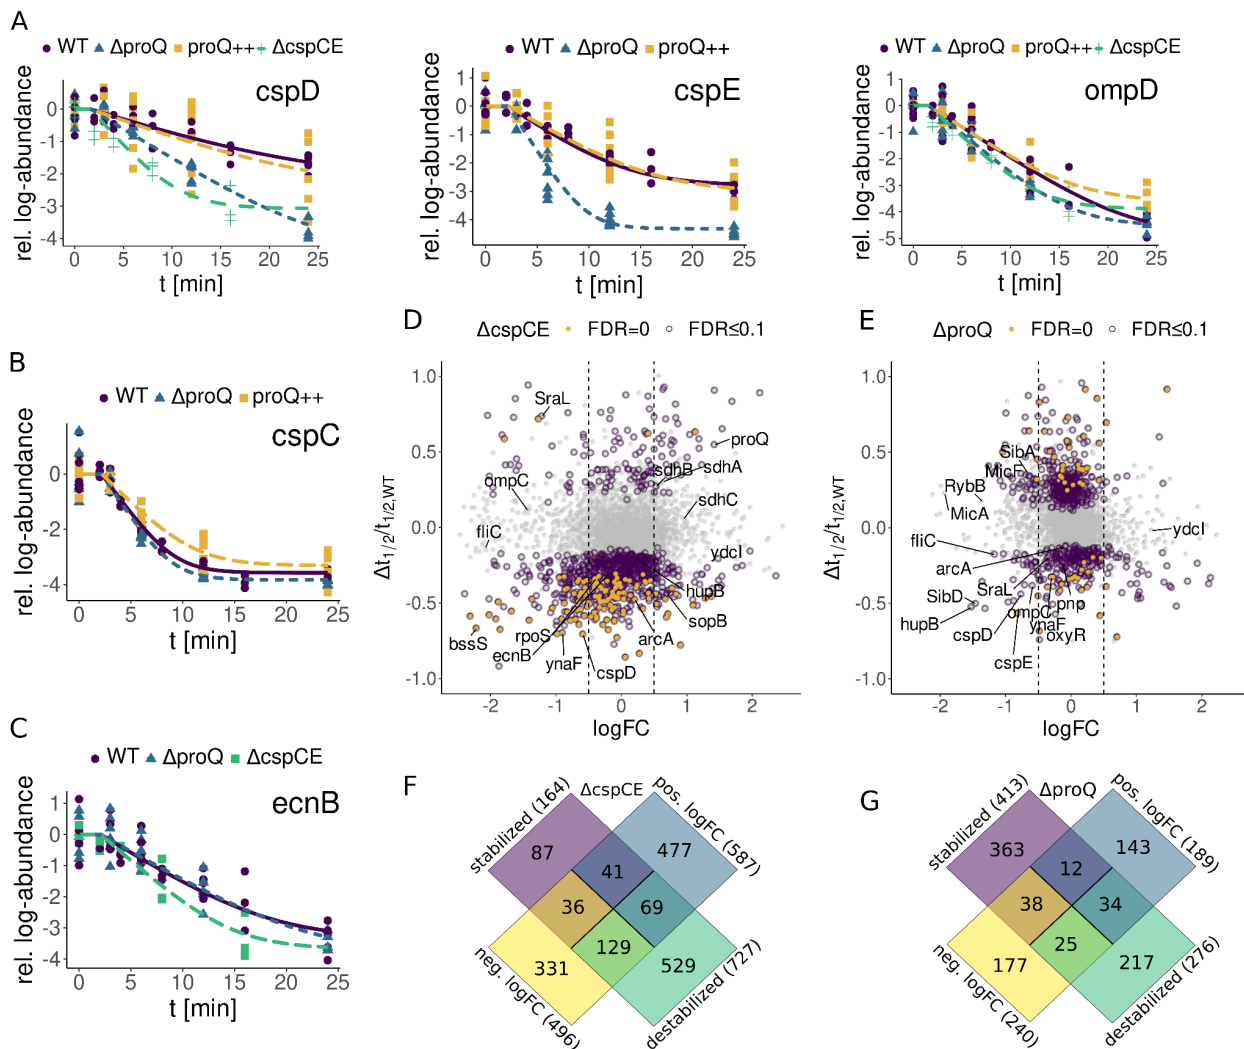

243  
 244 **Figure 2. Differential analysis of transcript stability in the absence of CspC/CspE/ProQ**  
 245 (A-C) Decay curves of known ProQ (*cspD*, *cspE*, *ompD*, *cspC*) or CspC/E (*ecnB*) targets. (D)  
 246 Relative difference in half-life vs. steady state log-fold changes between the  $\Delta cspCE$  and the  
 247 WT strain. (E) Relative difference in half-life vs. steady state log-fold changes between the  
 248  $\Delta proQ$  and the WT strain. (F) Overlap between stability changes and steady-state log-fold  
 249 changes in the  $\Delta cspCE$  strains. (G) Overlap between stability changes and steady-state log-fold  
 250 changes in the  $\Delta proQ$  strain.



251

252

## 253 **Integrating high-throughput datasets identifies cohorts of mRNAs subject to known RBP** 254 **regulatory mechanisms**

255

256 The location of an RBP binding site within a transcript is often a key determinant of the  
257 mechanism of RBP regulation. To investigate the potential mechanisms underlying the  
258 stabilization activity of ProQ and CspC/E, we integrated our differential stability estimates with  
259 UV crosslinking and immunoprecipitation followed by RNA sequencing (CLIP-seq), which can  
260 localize RBP binding sites within a transcript. For ProQ, we reanalyzed an existing CLIP-seq  
261 dataset (12), identifying 833 peaks indicative of binding (see Methods). We produced new  
262 CLIP-seq datasets for both CspC and CspE and identified 1155 CspC and 861 CspE peaks,  
263 spread across 571 and 462 target transcripts, respectively (**Figure 3A&B;S7A-C**). In total, 717  
264 transcripts are bound by at least one CSP, with 430 CspC peaks directly overlapping with a  
265 CspE peak (**Figure 3B**) supporting the previously reported partial redundancy between these  
266 proteins (16) and similar observations in *E. coli* (36). We saw especially dense clusters of  
267 CspC/E peaks in transcripts encoding genes involved in the TCA cycle, flagellar proteins, and  
268 proteins involved in host invasion associated with the Salmonella pathogenicity island 1 (SPI-1)  
269 type three secretion system (**Figure 3A**).

270

271 We next examined the distribution of RBP binding sites across target transcripts,  
272 beginning with ProQ. As previously reported (12), ProQ binds predominantly at the end of  
273 coding sequences, with half of detected binding sites within 100 nucleotides of the stop codon  
274 (**Figure 3D;S7D**). Amongst those genes with 3' binding sites, we identified 86 that were  
275 significantly destabilized upon *proQ* deletion (**Table S3**). Besides the known interaction of ProQ  
276 with the *cspE* mRNA, these include transcripts encoding the SPI-1 effectors SopD and  
277 SopE2, involved in host cell invasion (37), and OxyR, a transcription factor involved in the  
278 oxidative stress response (38). The location of these binding sites suggests that ProQ may  
279 protect the 3' ends of a large cohort of transcript from exoribonucleases attack, as previously  
shown for individual model transcripts (12, 18).

280

281 In contrast to ProQ, CspC and CspE binding sites were spread across coding (CDS)  
282 regions with only slight enrichment in the vicinity of the start and stop codons (**Figure 3C;S7D**).  
283 We identified 177 transcripts with a CspC and/or CspE binding site in the CDS or 5'UTR that  
284 were destabilized upon *cspC/E* deletion (**Table S4**). These included the *ecnB* transcript (**Figure**  
285 **S10A**), which has previously been shown to bind CspC and CspE *in vitro* and to be protected  
from RNase E by CspC/E *in vivo* (16). To further investigate the role of the CSPs in protection

286 from RNase E cleavage, we combined our stability and CLIP-seq data with a published dataset  
 287 mapping RNase E cleavage sites (39). We saw an enrichment of RNase E cleavage sites within  
 288 CspC/E CLIP-seq peaks (410/2059 compared to a median of 331/2059 across 100 simulations,  
 289  $p \approx 0$ , see *Methods*), but the majority of CspC/E binding sites did not directly occlude known  
 290 RNase E cleavage sites. Furthermore, the presence of an RNase E cleavage site within a peak  
 291 did not appear to influence differential decay rates upon *cspC/E* deletion (**Figure S7E**). This  
 292 suggests that rather than directly protecting cleavage sites, CspC/E may interfere with RNase E  
 293 scanning (40). This is further supported by the fact that destabilized transcripts have a median  
 294 of two CspC/E binding sites, while ligands without stability changes have a median of one  
 295 binding site (**Figure S7F**), suggesting multiple CspC/E proteins must bind to create an  
 296 obstruction of sufficient size to interfere with RNase E scanning (41).

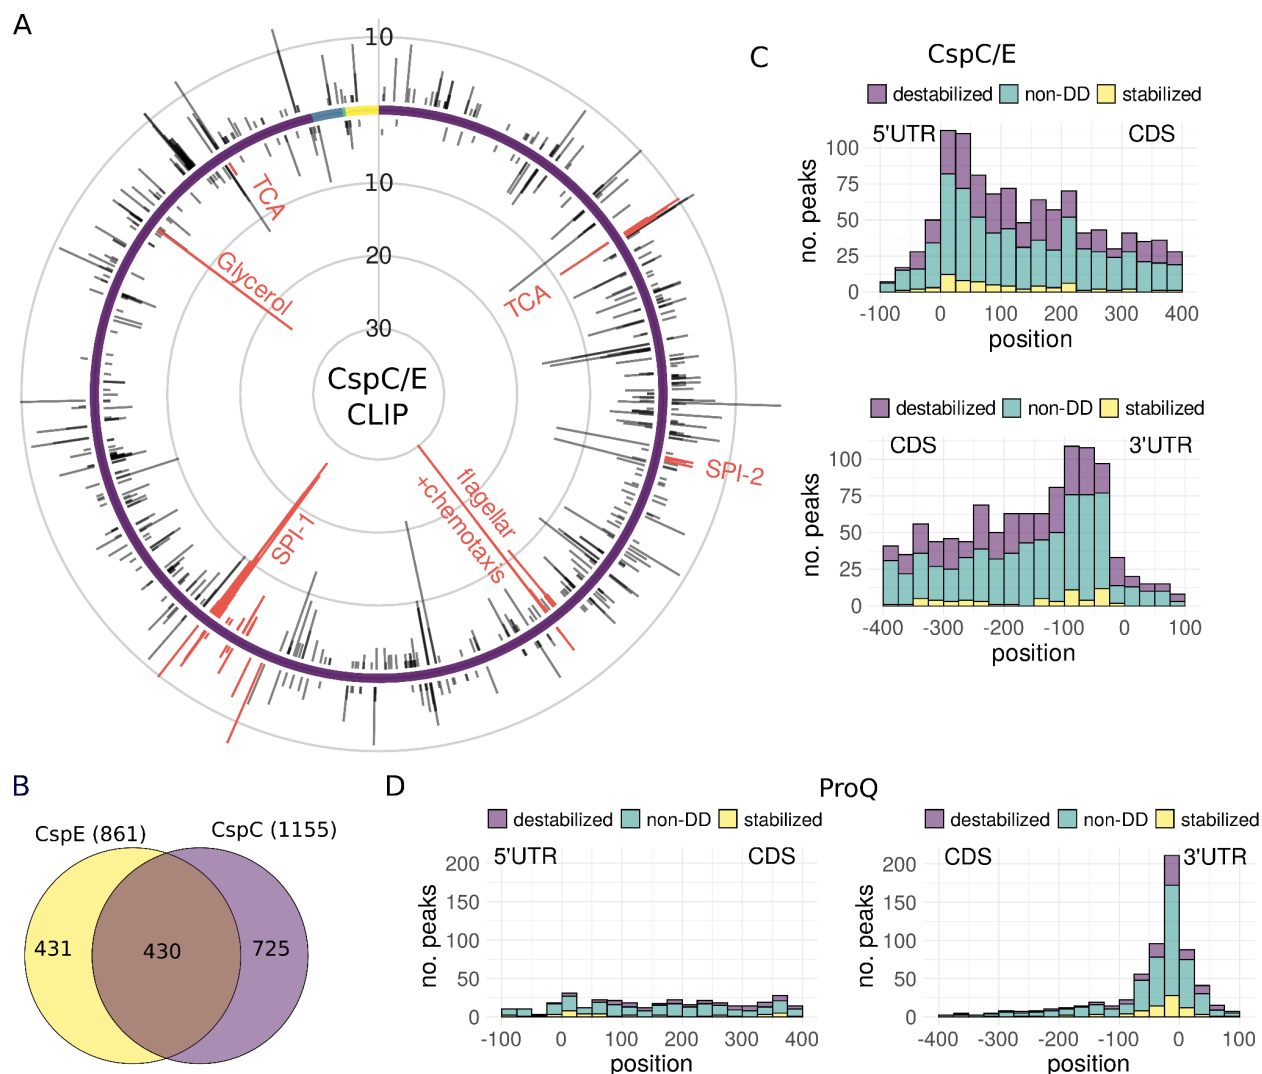

297

298 **Figure 3. CspC/E CLIP-seq, comparison with RIF-seq results.**

299 CspC/E CLIP-seq analysis: (A) Number of CspC/E binding sites binned by genomic position for the  
300 positive (outer) and negative (inner) strand. The chromosome is indicated in purple and the three  
301 plasmids in blue, green and yellow. (B) Venn diagram of binding sites, with shared targets defined by an  
302 overlap by at least 12 bases between CspE and CspC sites. (C-D) Metagene plot of transcripts bound by  
303 the respective RBP, ordered by position of CLIP-seq peak relative to the start/stop codon. Target  
304 sequences are colored by the effect of RBP deletion on stability: destabilized (purple), stabilized (yellow),  
305 or no differential decay (non-DD, green).

306  
307

308 **Long-lived transcripts rely on global RBPs for their stability**

309

310 To further examine the global impact of RBPs in shaping the transcriptome, we investigated the  
311 relationship between our estimated mRNA half-lives and RBP binding as determined by CLIP-  
312 seq for four major Salmonella RBPs at early stationary phase: ProQ (12), CspC/E (this study),  
313 Hfq and CsrA (42). After sorting transcripts by stability, we saw a clear association between  
314 half-life and RBP binding, with over half of the 500 most stable transcripts ( $t_{1/2} > 2.5$  min) bound  
315 by at least one RBP (**Figure 4A**). While the probability of detecting a CLIP-seq peak increases  
316 with transcript abundance, there is no correlation between transcript abundance and stability  
317 (**Figure S3F**) suggesting the relationship between RBP binding and stability is unlikely to be an  
318 artifact of our measurements. Long-lived transcripts are also more likely to be destabilized upon  
319 RBP deletion than shorter-lived ones, regardless of RBP-binding. Of the 500 most stable  
320 transcripts, 32% are significantly destabilized in the absence of ProQ and 51% in the absence of  
321 CspC/E. Investigating the relationship between transcript half-life and differential half-life upon  
322 RBP deletion revealed large changes in median half-life for stable transcripts (**Figure 4B**),  
323 indicating that long-lived transcripts are not only bound by RBPs but also rely on them for their  
324 stability.

325

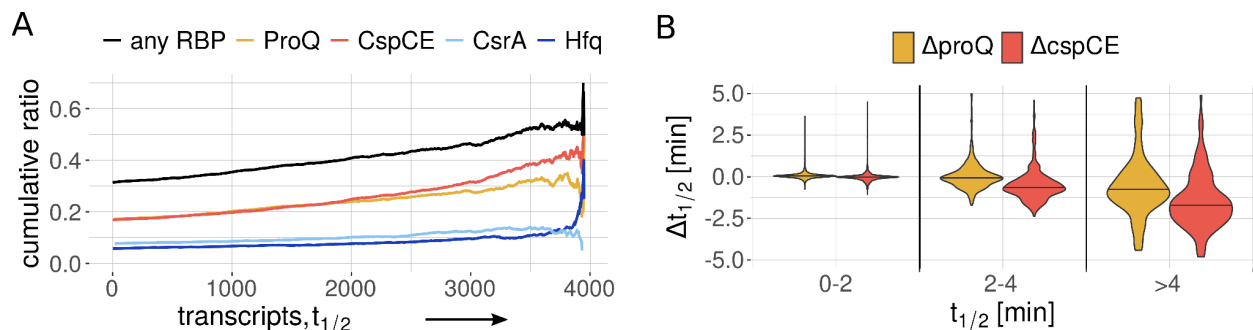

326 **Figure 4. Global effect of RBP binding on transcript stability**

327 (A) Cumulative ratio of transcripts bound by RBPs. The transcripts were ordered by half-life and the  
328 fraction of transcripts bound by RBPs was calculated starting from the most long-lived transcript. (B)

329 Change in half-life in the  $\Delta proQ$  and  $\Delta cspCE$  strain for transcripts with a half-life of 0-2 min, 2-4 min, and  
330 greater than 4 min.

331  
332  
333  
334  
335

### 336 **RBPs play overlapping and complementary roles in infection-relevant pathways**

337

338 To investigate the physiological consequences of RBP deletion, we identified pathways  
339 enriched in differentially stabilized and differentially expressed transcripts in the *proQ* and  
340 *cspC/E* deletion strains with the GSEA algorithm (43) (**Figure 5A & S8A**). Surprisingly, we  
341 found a large overlap in enriched gene sets in both deletion backgrounds. On the level of  
342 stability this included responses to extracellular stimulus and oxidative stress, flagellar  
343 assembly, and metabolite transport and utilization pathways including the phosphotransferase  
344 system and glyoxylate and dicarboxylate metabolism. Several of these gene sets were also  
345 enriched in differentially expressed transcripts, though the directions of the changes were often  
346 inconsistent with the observed effects on stability. For instance, genes involved in flagellar  
347 assembly were expressed at lower levels in both deletion strains despite their transcripts being  
348 stabilized (**Figure S8B & S12**). Some pathways, such as aerobic and anaerobic respiration,  
349 showed consistent changes in expression levels across both strains despite no clear shared  
350 enrichment on the level of stability.

351 The large overlap in pathways affected at the level of stability and expression between  
352 the two RBP deletion strains led us to investigate the relationship between ProQ- and CspC/E-  
353 mediated regulation. We examined transcripts significantly differentially expressed in both  
354 strains, finding a strong correlation between the steady-state log fold-changes (**Figure 5B**,  
355  $r=0.89$ ). The slope of a line fitted to these changes indicated stronger average changes in the  
356 *cspC/E* deletion; this was particularly clear for genes involved in flagellar assembly and  
357 chemotaxis which exhibited an ~2-fold lower expression in the  $\Delta cspC/E$  background compared  
358 to  $\Delta proQ$ . The lack of a similarly strong correlation for changes in transcript stability (**Figure**  
359 **S8C & D**) suggested that some of the similarities in changes in steady-state mRNA abundance  
360 between the two deletion strains may be due to indirect regulation, with that in the  $\Delta proQ$   
361 background possibly mediated by changes in CspE expression.

362 Given the strong changes we observed in mRNA abundance for genes involved in  
363 aerobic and anaerobic respiration (**Figure 5A & S13**), we investigated the regulon of the aerobic  
364 respiratory control response regulator ArcA whose transcript was destabilized in both RBP

365 deletion strains (**Figure S9A**) but not differentially expressed. We found a strong rank-  
366 correlation among genes in the ArcA regulon between differential expression previously  
367 observed in a  $\Delta arcA$  strain (44) in both RBP deletion strains (**Figure 5C; S9B & C**), with a  
368 stronger correlation in the  $\Delta cspC/E$  background ( $\rho=0.62$  vs. 0.50) in keeping with the stronger  
369 destabilization of the *arcA* mRNA in this strain (**Figure S9A**). This indicates that some of the  
370 shared changes in steady state mRNA abundance observed in both deletion strains may be the  
371 result of shared regulation of ArcA expression, and further that transcript destabilization may be  
372 sufficient to affect protein abundance in the absence of clear changes in transcript abundance.

373 Despite the large overlaps in mRNA stability and abundance changes, there were a  
374 number of changes specific to each RBP, though these were often in the same pathways. For  
375 instance, deletion of each RBP affected the stability of a discrete set of secreted effectors  
376 involved in host cell invasion (**Figure S9D**). Another such change was in the oxidative stress  
377 response pathway, where we saw a stronger enrichment for destabilized transcripts in the  
378  $\Delta proQ$  strain (**Figure S11**). Transcripts destabilized by *proQ* deletion included those encoding  
379 for the oxidative stress regulator OxyR (**Figure S9E & F**), the superoxide dismutase SodB, the  
380 catalase-peroxidase KatG, and the DNA protection during starvation protein Dps; however, few  
381 of these transcripts showed significant differences in mRNA abundance.

382 To test if destabilization was predictive of phenotype, we exposed the  $\Delta proQ$  and  
383 *proQ*<sup>++</sup> strains to varying concentrations of hydrogen peroxide, including a  $\Delta oxyR/S$  strain as a  
384 control. After exposure to 1.5mM H<sub>2</sub>O<sub>2</sub> we saw a survival defect for both  $\Delta proQ$  and *proQ*<sup>++</sup>  
385 strains intermediate between wild-type survival and that of the  $\Delta oxyR/S$  strain (**Figure S9G**).  
386 However, this defect was concentration dependent: exposure to 2mM H<sub>2</sub>O<sub>2</sub> led to a severe  
387 survival defect in the  $\Delta proQ$  strain that could be complemented by *proQ* overexpression (**Figure**  
388 **5D**), while  $\Delta oxyR/S$  behaved similarly to wild-type. This indicates that the  $\Delta proQ$  survival defect  
389 after exposure to high concentrations of H<sub>2</sub>O<sub>2</sub> is independent of any effects ProQ has on the  
390 stability of the *oxyR* transcript and likely depends on the effects of ProQ on other transcripts  
391 involved in the oxidative stress response. The sensitivity of the  $\Delta proQ$  strain to oxidative stress  
392 also shows that changes in transcript stability can be predictive of RBP deletion phenotype,  
393 even without corresponding changes in transcript abundance under standard growth conditions.

394

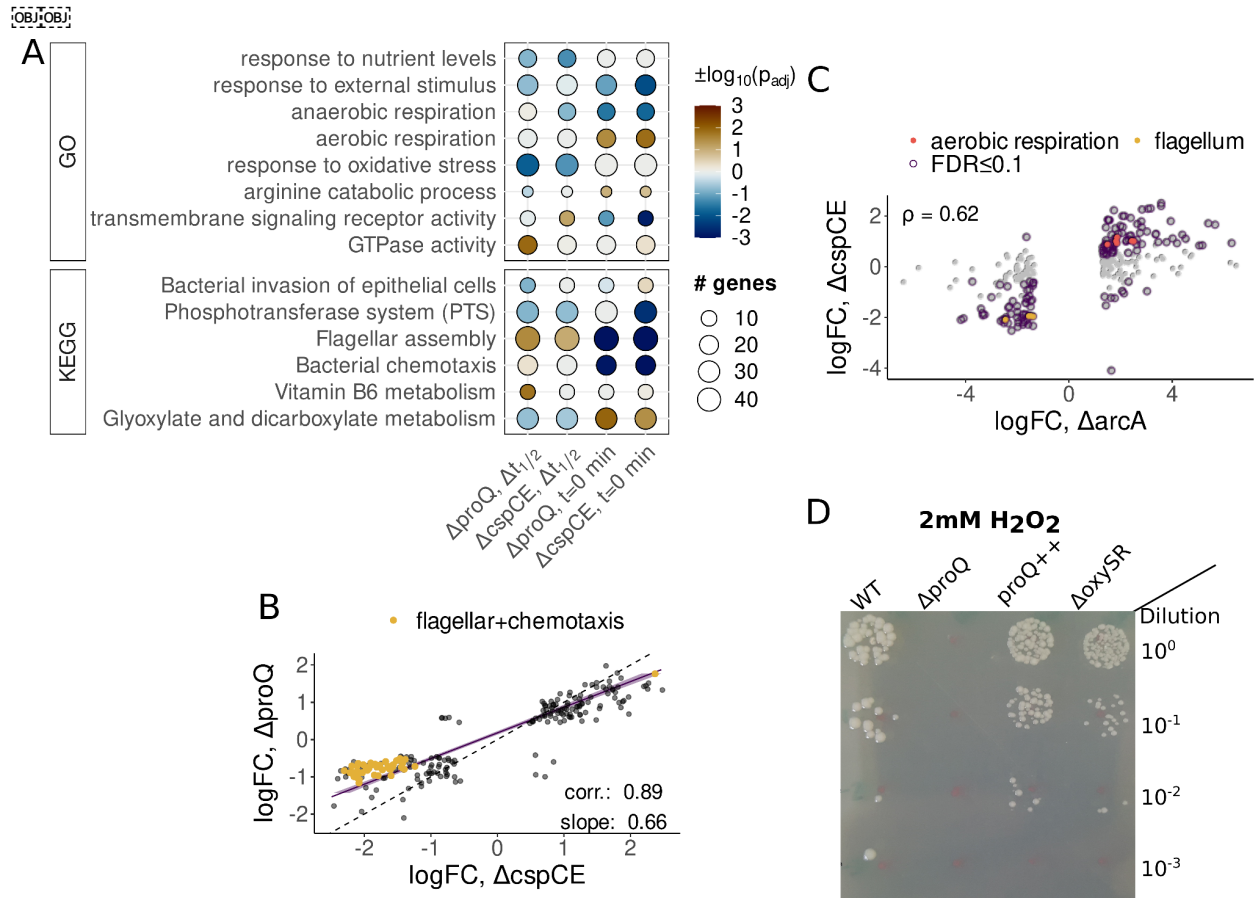

395

396

### Figure 5. Integrative analysis of RBP binding and transcript stability

397

(A) Comparative analysis of pathways enriched in *cspCE* and *proQ* RIF-seq data. Pathways enriched in transcripts destabilized or with negative steady-state log-fold changes ( $t = 0$  min) upon RBP deletion are marked blue. Pathways enriched in stabilized transcripts or positive log-fold changes are marked brown.

399

(B) Genetic features with significant log-fold changes in both the *proQ* and the *cspC/E* deletion mutant.

400

(C) log-fold changes in the *cspC/E* deletion mutant vs. an *arcA* deletion mutant (44).

401

(D) Exposure of various *Salmonella* strains to 2mM of hydrogen peroxide.

402

403

404

405

### Discussion

406

Together with transcription and translation, mRNA degradation is one of the fundamental

407

processes controlling protein production in the cell. Rapid turnover of mRNAs underlies the

408

ability of bacteria to rapidly adapt to new conditions: as protein production is constrained by the

409

translational capacity of the available ribosome pool (45), clearance of transcripts encoding for

410

unnneeded proteins is essential to change the composition of the proteome. Previous work

411

based on RNA-seq and microarray analysis of rifampicin time course data in *E. coli* and

412

*Salmonella* has reported average mRNA half-lives in the range of 2 to 7 minutes (20–22, 46–

413

48). The most similar prior RNA-seq study to our own reported an average half-life of 3.1

414

minutes across ~1200 transcripts in *E. coli* grown to stationary phase (22), over three times our

415 estimated average decay rate of 0.9 minutes in *Salmonella* at ESP. This discrepancy appears to  
416 originate from not accounting for the baseline stable RNA concentration, leading to a systematic  
417 underestimation of the decay rate. Interestingly, our estimates are in the range of those derived  
418 from classic experiments that pulse radiolabeled bulk RNA and determined average mRNA half-  
419 life to be ~0.7 minutes in exponentially growing *E. coli* (49), far shorter than any other  
420 subsequent estimates based on high-throughput approaches. This rapid decay may in part  
421 underlie the ability of bacteria to rapidly adapt their transcriptomes, as constant transcription  
422 would be required to maintain mRNA concentrations. As mRNA half-lives have primarily been  
423 determined by rifampicin treatment followed by sequencing or microarray analysis in those  
424 bacteria where transcriptome-wide measurements are available (50), our results suggest that  
425 mRNA stability has likely been widely overestimated and that a general reevaluation of bacterial  
426 transcript stability is in order.

427 Our hierarchical Bayesian analysis of RIF-seq data provides a principled framework for  
428 the analysis of RNA turnover, including the determination of differential decay rates after  
429 deletion of an RBP of interest. The flexibility of Bayesian analysis allowed us to account for  
430 nonlinearities due to confounding factors like transcription elongation after rifampicin addition  
431 and RNA baseline concentration, removing substantial biases in our determination of decay  
432 rates. Despite our best efforts, it is likely that there are still some limitations to our analysis. For  
433 instance, our control for false discovery rates means that we have likely missed some genuine  
434 instances of differential decay. Our simulations suggest an 85% sensitivity for the most precisely  
435 measured transcripts, but this falls to ~30% when considering the whole transcriptome (**Figure**  
436 **S4D**). Other limitations may be due to uncontrollable effects in the data. For example, some  
437 *Salmonella* promoters have previously been shown to respond specifically to subinhibitory  
438 rifampicin (51), which could introduce some bias to decay rate estimates for affected transcripts  
439 should similar effects occur with the rifampicin concentrations used here. Manual inspection of  
440 our decay curves suggests this is unlikely to be a widespread problem in our data. Similarly, if  
441 RBP deletion leads to modulation of expression of cellular RNases, our individual differential  
442 decay rates may not be reflective of the differential decay induced by simple ablation of an RBP  
443 binding site. Such a bias dependent on the cellular context of rifampicin treatment has  
444 previously been observed for the sRNA RyhB whose stability critically depends on the presence  
445 of its target mRNAs (52).

446 Regardless of potential biases, high-throughput methods provide at least one major  
447 advantage over classical molecular approaches to RBP characterization: numbers. Where  
448 previously a small handful of transcripts were known to be stabilized by 3' binding of ProQ in

449 *Salmonella*, we find 86 candidates. Similarly, we expand the number of transcripts known to be  
450 stabilized by CspC/E from two to a predicted cohort of 177. By combining CLIP-seq (12) and  
451 RNase E cleavage profiling (39) with our differential stability data, we have defined cohorts of  
452 transcripts likely subject to particular modes of RBP regulation. Depending on the binding site  
453 within a transcript, up to 44% (CspC/E, CDS) and 32% (ProQ, close to the stop codon) of direct  
454 RBP targets showed altered stability upon deletion of the respective RBP. However, in both  
455 cases transcripts stabilized by RBP binding are outnumbered by those apparently bound, but  
456 unaffected at the level of stability, raising numerous questions about RBP function. How are  
457 transcripts stabilized by RBPs differentiated from those that are not? Do RBP interactions that  
458 do not affect stability perform other functions in the cell? Our analysis suggests CspC/E may  
459 protect some transcripts from RNase E through a roadblock mechanism (40); CspC/E targets  
460 may additionally or alternatively be regulated at the level of translation (53) or antitermination  
461 (54) through the manipulation of mRNA secondary structure as has been shown for the targets  
462 of other CSPs. Alternative roles of ProQ remain to be well defined, but it has been shown to  
463 play a role in gene regulation by sRNAs (14, 55). By defining and partially characterizing RBP  
464 targets, our data provides a starting point for the molecular investigations needed to further  
465 define the functions of CspC/E and ProQ.

466         The degree to which post-transcriptional regulation shapes the bacterial proteome has  
467 long been controversial. Recent work has suggested that, on average, protein concentrations  
468 are primarily determined by promoter on rates with post-transcriptional regulation playing only a  
469 minor role (56). Here in contrast, we have shown that deletion of bacterial RBPs thought to act  
470 primarily at the post-transcriptional level leads to large changes in both RNA stability and  
471 steady-state transcript concentration, and strong phenotypes have been observed for RBP  
472 deletion in a variety of conditions (5, 16, 57). How can these findings be reconciled? Our data  
473 provides at least two potential answers. First, as suggested by the effects of *proQ* and *cspC/E*  
474 deletion on the ArcA regulon (**Figure 5C**), modulation of stability or translation of single  
475 transcriptional regulators may ultimately cause phenotypic changes by indirectly affecting the  
476 promoter on rates of a large cohort of transcripts. The lack of correlation we observe between  
477 changes in steady-state RNA levels and differential stability (**Figure 2D&E**) indicates that such  
478 indirect effects are widespread. Secondly, our analysis shows that the majority of RNA half-lives  
479 are concentrated at less than 1 minute (**Figure 1E**), and it is indeed difficult to understand how  
480 further destabilization through post-transcriptional regulation could have strong effects on  
481 translation. However, the half-life distribution is long tailed, with ~500 transcripts having half-  
482 lives of greater than 2.5 minutes and being preferentially bound by RBPs (**Figure 4A**). The



483 stability of this population of transcripts is strongly affected by RBP deletion (**Figure 4B**), further  
484 suggesting they may be the major targets of post-transcriptional regulation.

485 An accumulating body of work suggests that the post-transcriptional regulatory networks  
486 scaffolded by RBPs are interconnected. At least two Hfq-dependent sRNAs also serve as  
487 sponges for CsrA (58, 59), and RNA-RNA interactome studies have observed a substantial  
488 fraction of shared targets between Hfq and ProQ (13). Regulatory interactions between cold  
489 shock proteins (CSP) have long been observed, with deletion of particular CSPs leading to the  
490 induction of others (16, 60), presumably through undescribed feedback mechanisms. The *cspE*  
491 mRNA has previously been used as a model for understanding the molecular mechanism of  
492 ProQ protection of 3' ends (12); our results suggest some fraction of the change in steady-state  
493 transcript levels observed in the *proQ* deletion strain may be the result of indirect regulation  
494 through CspE (**Figure 5B**). Additionally, both RBPs affect the stability of mRNAs in similar  
495 pathways (**Figure 5A**), though often by targeting different transcripts, as for the SPI-1 effectors  
496 (**Figure S8B**). We also find effects for both strains on the stability of the CsrA-sponging sRNA  
497 CsrB, with *proQ* and *cspC/E* deletion having opposite effects on half-life (**Figure S10B & C**),  
498 adding a further potential connection between RBP regulatory networks. Our reanalysis of  
499 publicly available CLIP-seq data suggests that a substantial number of mRNAs are targeted by  
500 two or more RBPs (**Figure S10D**). What this apparently dense interconnection between RBP-  
501 mediated regulatory networks means for the cell, and how RBP activity is coordinated to  
502 maintain homeostasis in diverse environmental conditions, is an open question that will likely  
503 take significant conceptual advances to answer.

504

## 505 **Data Availability**

506 Data deposition: All sequencing data reported in this paper have been deposited in the Gene  
507 Expression Omnibus (GEO) database, <https://www.ncbi.nlm.nih.gov/geo> (SuperSeries no.  
508 GSE234010). Transcript annotations and source code for the Stan models have been made  
509 available at [https://github.com/BarquistLab/RIF-seq\\_repo](https://github.com/BarquistLab/RIF-seq_repo)

510

## 511 **Acknowledgements**

512 We thank Joel Belasco, Erik Holmqvist, Susan Gottesman and Anke Sparmann for insightful  
513 comments on the manuscript, and Alexandre Smirnov for providing northern blot quantifications  
514 from (11). This project was funded in part by the Bavarian State Ministry for Science and the  
515 Arts through the research network bayresq.net (to LB, JV).

516

## 517 **Methods**

518

### 519 **Media and Growth Conditions**

520 For all experiments in this study, broth cultures were grown from single colonies overnight at 37  
521 °C in LB medium (5 g/L of yeast extract, 5 g/L of NaCl, and 10 g/L of Tryptone/Peptone ex  
522 casein; Roth). Subsequently, cultures were diluted 1:100 in fresh medium, and further grown at  
523 37°C with shaking at 220 rpm to an OD<sub>600</sub> of 2.0 (early stationary phase (ESP), a SPI-1  
524 inducing condition (28)).

525

### 526 **Bacterial Strains and Plasmids**

527 *Salmonella enterica* serovar Typhimurium strain SL1344 (strain JVS-1574 (61)) is considered  
528 wild-type (WT). The generation of *proQ* and *cspC/E* deletion strains by lambda red homologous  
529 recombination (62) has been previously described (11, 16). For the *proQ*++ strain, a strain  
530 containing plasmid pZE12-ProQ was used as previously described (11, 14). The complete lists  
531 of bacterial strains, plasmids, oligos and antibodies used in this study are provided in Table S8-  
532 11.

533

### 534 **Rifampicin assay protocol for Sequencing**

535 Wild-type (WT),  $\Delta$ RBP and RBP++ strains were grown until an OD<sub>600</sub> of 2.0 in three (WT, *cspCE*)  
536 or six (WT, *proQ*, *proQ*++) replicates. The cultures were treated with 500µl/ml of rifampicin (stock  
537 solution 50mg/ml resuspended in DMSO). Samples were taken before ( $t = 0$  min) and after 3, 6,  
538 12, 24 min (*proQ*) or 2, 4, 8 and 16 min (*cspCE*) of rifampicin treatment. 2ml were collected for  
539 each sample, immediately mixed with 20% vol. stop mix (95% ethanol, 5% phenol) and snap  
540 frozen in liquid nitrogen.

541 Subsequently, the samples were thawed on ice and centrifuged for 20 min at 4500 rpm.  
542 Half of the resuspension of each sample was then used to perform hot phenol extraction. Bacterial  
543 pellets were resuspended in 600 µl of 0.5 mg/ml of lysozyme in TE buffer pH 8 and transferred  
544 into a 2 ml Eppendorf tube. 60 µl of 10% w/v SDS was then added and the samples were mixed  
545 by inversion. Tubes were placed at 64°C for 1-2 min until clearance of the solution, then 66 µl of  
546 3M sodium acetate solution at pH 5.2 was added and tubes were mixed by inversion. 750 µl of  
547 phenol (Roti-Aqua phenol #A980.3) was then added to each tube, mixed by inversion and  
548 incubated for 6 min at 64°C. Tubes were then placed on ice to cool and spun for 15 min at 13 000  
549 rpm, 4°C. The resulting aqueous layer was transferred in a 2 ml PLG tube (5PRIME) where 750  
550 µl of chloroform (Roth, #Y015.2) was added. After mixing by inversion, the tubes were spun for  
551 15 min at 13 000 rpm, 4°C. The obtained aqueous layer was then collected and precipitated in a  
552 30:1 mix of 100% ethanol: 3M sodium acetate pH 6.5 at -20°C for at least 2 hr. After centrifugation  
553 for 30 min, 13 000 rpm, 4°C, the pellet was washed with 70% ethanol and the air-dried pellet was  
554 resuspended in nuclease-free water. Total RNA was measured by nanodrop, and integrity was  
555 checked on TBE agarose gel. 40 µg of RNA in 39.5 µl of nuclease free water were then subjected  
556 to DNase I treatment. Total RNA was denatured for 5 min at 65°C and put back on ice. 5 µl of  
557 DNase I (Fermentas), 5 µl of DNase I buffer (Fermentas) and 0.5 µl of Superase In (Thermo  
558 Fisher Scientific) were added to the denatured RNA and incubated at 37°C for 30 min. After  
559 incubation, 100 µl of nuclease free water was added and each reaction was placed in a PLG tube  
560 containing 150 µl of PCI. Tubes were centrifuged for 15 min at 4°C, 13 000 rpm. The aqueous  
561 phases were collected and precipitated in 30:1 Ethanol/sodium acetate mix at -20°C for at least 2  
562 hr. total RNA. DNase treated pellets were collected by centrifugation (30 min, 4°C, 13 000 rpm)  
563 and after 70% ethanol wash, were resuspended in 25 µl nuclease free water. Prior to rRNA  
564 depletion and cDNA library preparation, 2.5 µl of 1/10 ERCC spike-ins was added to each sample.

565 RNA-seq libraries were prepared by Vertis AG (Freising-Weihenstephan, Germany).  
566 Ribosomal RNA was depleted using the Ribo-Zero bacterial rRNA Removal Kit (Illumina). RNA  
567 was polyadenylated with poly(A) polymerase, 5'-triphosphates were removed with tobacco acid  
568 pyrophosphatase followed by ligation of a 5'-adapter. First-strand cDNA synthesis was performed  
569 with an oligo(dT) barcoded adapter primer and the M-MVL reverse transcriptase. The resulting  
570 cDNA was PCR-amplified with a high fidelity DNA polymerase. cDNA was purified with the  
571 Agencourt AMPure XP kit (Beckman Coulter Genomics) and sequenced on an Illumina  
572 HiSeq2000. Replicate 2 of the 24 minute time point for WT,  $\Delta proQ$ , and  $proQ^{++}$  was excluded  
573 from subsequent analysis, as rRNA depletion failed.

574

### 575 **Processing of Sequence Reads and Mapping RIF-seq**

576 The 75 nt RNA-seq reads were demultiplex and quality control of each sample was performed  
577 with fastQC. Afterwards, Illumina adapters were removed with Cutadapt v4.1, and STAR (63)  
578 was used to align the reads to the SL1344 genome (NCBI accessions: FQ312003.1,  
579 HE654724.1, HE654725.1 and HE654726.1). For all analyses related to annotated genomic  
580 features such as CDSs, tRNAs, and rRNAs, gene annotations from NCBI were used. We use  
581 the same definition of transcriptional units as (42) which is based on the NCBI CDS annotations,  
582 transcription start site annotations (64), and Rho-independent terminator prediction with RNIE  
583 (65). sRNA annotations are based on (11). The ERCC92.fa sequence file for the quantification  
584 of the spike-in was obtained from ThermoScientific. For quantification, htseq-count with default  
585 options was used for counting reads aligning to CDS, sRNA and ERCC spike-ins, while the 60  
586 base sub-genic windows were counted with the option *--nonunique all* to ensure that  
587 overlapping reads are assigned to all overlapping segments. For the 60 base windows, reads  
588 were quantified separately for the positive and the negative strand.

589

### 590 **Read Count Normalization of RIF-seq Data with ERCC spike-ins**

591 The normalization factor for each sample  $s$  was determined using the mean M-value across 30  
592 detected ERCC spike-ins, as there were no apparent outliers (**Fig. S2B&C**). Only transcripts  
593 with more than 10 counts-per-million (cpm) before normalization in at least three samples in the  
594 ProQ assay were retained for further analysis.

595

596 Normalized counts-per-million (cpm) were obtained by adding a pseudo count and then dividing  
597 the read counts  $Y_{gr}(t)$  by the respective library size  $N_s$  and normalization factor  $n_{f,s}$  of the  
598 sample

$$\text{cpm}_{gr,s} = \frac{(Y_{gr,s} + 0.5) \cdot 10^6}{N_s n_{f,s} + 1}$$

599

600 The Stan models were applied to the natural logarithm of the normalized cpm values  $y_{gr}(t) \equiv$   
601  $\ln(\text{cpm}_{gr}(t))$ .

602

### 603 **Removal of batch effects: center-mean normalization**

604 Following spike-in normalization, we observed some clustering by replicate rather than condition  
605 within time point groups (**Figure S2D&I**). To account for these batch effects, we developed a  
606 center-mean (CM) normalization procedure, which can be applied after a primary normalization,  
607 e.g. with spike-ins, and compensates for small variations in the amount of spike-ins added to the  
608 individual samples. After the normalization with spike-ins, we calculated a gene-wise mean log-

609 count  $y_{gc}(t)$  for every condition and every time-point (see **Figure S2E** for  $t = 0$  min). This value  
610 was subtracted from the observed value in every sample

$$611 \quad y_{0,gr}(t) = y_{gr}(t) - y_{gc}(t)$$

612 For every sample  $s$  (uniquely defined by condition  $c$ , time  $t$ , replicate  $r$ ), we calculated the mean

$$\ln(n_{b,s}) = \frac{1}{N_g} \sum_g y_{0,gr}(t),$$

613  
614 where  $n_{b,s}$  is an additional normalization constant. The batch-corrected cpm values are then  
615 given by

$$616 \quad \text{cpm}_{gr,s} = \frac{(Y_{gr,s} + 0.5) \cdot 10^6}{N_s n_{f,s} n_{b,s} + 1}.$$

617 PCA confirmed that the samples separated well by time point and genotype after the CM  
618 normalization (**Figure S2F&L**), and boxplots showed an improved alignment of median logcpm  
619 values (**Figure S2G,H,J,K**). Before fitting the decay curves with the Bayesian models, we  
620 subtracted the mean log-count at  $t = 0$  min

$$621 \quad \tilde{y}_{gr}(t) = y_{gr}(t) - y_{gc}(t = 0\text{min}).$$

622

### 623 **Calculation of detection limit**

624 In order to regularize zero counts, we have added a pseudo count of 0.5. The library sizes vary  
625 in size around 10 million reads and the normalization constants around 1. This results in an  
626 estimated minimum log-count of

$$627 \quad y_{\min} = \ln\left(\frac{0.5 \cdot 10^6}{N_s n_{f,s} n_{b,s} + 1}\right) \sim \log\left(\frac{0.5}{10}\right).$$

628 After subtracting the mean log-count at  $t = 0$  min, we can calculate the detection limit for gene  $g$   
629 in condition  $c$  as

$$630 \quad \tilde{y}_{\text{lim},gc} = y_{\min} - y_{gc}(t = 0\text{min}).$$

631 This corresponds to the minimal possible value of the log relative expression.

632

### 633 **Differential gene expression analysis**

634 Log-fold changes were calculated using glmQLFit from edgeR (24) with a cutoff of 0.25 on the  
635 log-fold changes. Since batch effects present after TMM normalization (**Fig. S1 A,B&E**),  
636 samples were additionally normalized using RUVg (66) (**Fig. S1C&G**). We selected the 800  
637 least varying genes between the  $\Delta$ RBP and the WT strain. Since the differences between the  
638  $proQ++$  and the WT strain were larger, we only took the 600 least varying genes between these  
639 two conditions. The intersection between these sets is 37 genes which we used as negative  
640 control (**Fig. S1F**). The number of factors of unwanted variation  $k$  was set to 6. After RUVg  
641 normalization, the samples clustered by strain (**Fig. S1C&H**). We selected differentially  
642 expressed genes at an FDR of 0.1 (**Fig. S1I-K, Table S2**).

643

### 644 **Extraction of RNA half-lives from RIF-seq data**

645 We compared three statistical models, summarized in **Figure 1B**. All models assume that the  
646 normalized log counts follow a normal distribution around a condition and gene-dependent  
647 mean

648 
$$\tilde{y}_{gcr}(t) \sim \mathcal{N}(\mu_{gc}(t), \sigma_g(t)).$$

649 The variance  $\sigma_g^2$  is not condition-dependent. The mean  $\mu_{gc}$  is parameterized differently in the  
650 three statistical models:

651 **Linear model (LM):**  $\mu_{gc}(t) = -\beta_{gc} \cdot t$

652 **Piecewise linear model (PLM):**  $\mu_{gc}(t) = -\Theta(t - \gamma_g)\beta_{gc} \cdot (t - \gamma_g)$

653 **Log-normal model (LNM):**  $\mu_{gc}(t) = \ln[\pi_{gc} + (1 - \pi_{gc}) \exp(-\Theta(t - \gamma_g)\beta_{gc} \cdot (t - \gamma_g))]$

654 where  $\theta$  is the Heaviside step function which is 0 for negative arguments and 1 otherwise. The  
655 baseline parameter  $\pi_{gc}$  introduced in the LNM corresponds to the fraction of stable RNA for  
656 gene  $g$  in condition  $c$  as compared to steady-state levels at  $t = 0$  min. A hierarchical prior is  
657 used for both the WT decay rate and the standard deviation which leads to variance shrinking  
658 and reduces the effect of outliers. For other parameters ( e.g. difference in decay rate), broad  
659 priors were chosen to minimize their influence on posterior estimates. Priors were defined as  
660 follows:

661 WT decay rate  $\beta_{g,WT} \sim \mathcal{N}(\mu_\beta, \sigma_\beta)$

662 Mutant decay rate  $\Delta\beta_{gc} = \beta_{gc} - \beta_{g,WT} \sim \mathcal{N}(0, 0.2)$

663 Standard deviation  $\sigma_g(t) \sim \mathcal{N}_{\geq 0}(\mu_\sigma, \sigma_\sigma)$

664 Baseline parameter  $\pi_{gc} \sim \mathcal{N}(0, 0.25), \pi_{gc} \in [0, 0.2]$

665 Hyperparameters (Cauchy/normal distribution)  $\mu_\beta, \mu_\sigma, \sigma_\beta \sim \mathcal{C}_{\geq 0}(0, 1),$

666  $\sigma_\sigma \sim \mathcal{N}_{\geq 0}(0.3, 0.3)$

667 Elongation time (Cauchy distribution)  $\gamma_g \sim \mathcal{C}(0, 2), \gamma_g \in [0, 12]$

668 For  $\pi_{gc} = 0$ , the LNM is equivalent to the PLM, which converts to the LM as  $\gamma_{gc} \rightarrow 0$ . The  
669 statistical models are fitted to the RIF-seq data using the probabilistic programming language  
670 Stan (v.2.30.1) (27) with two chains and 1000 MCMC samples each (method=sample  
671 num\_samples=1000 num\_warmup=1000 adapt delta=0.95 algorithm=hmc  
672 engine=nuts max\_depth=15). The statistical model was applied to all four strains (WT,  
673  $\Delta proQ$ ,  $proQ++$ ,  $\Delta cspCE$ ) at once. The reported parameters (decay rate, half-life, transcription  
674 elongation time) correspond to the median of the 2000 MCMC samples. The median of the  
675 transcriptome-wide half-lives corresponds to the median of the 2000 MCMC samples of the  
676 hyperparameter  $\mu_\beta$ . In addition to the 2<sup>nd</sup> replicate of the time point taken at 24 minutes for the  
677  $proQ$  experiments, the 1<sup>st</sup> replicate of the 4 min time point of the  $\Delta cspCE$  mutant was removed  
678 from this part of the analysis because it clustered together with the 0 min time point (**Figure S1I**)  
679 which strongly influenced differences in decay rate in the  $\Delta cspCE$  mutant.

680

### 681 **Model comparison using leave-one-out cross validation**

682 For a quantitative comparison of the linear model (LM), the piecewise linear model (PLM) and  
683 the log-normal model (LNM), we estimated the out-of-sample predictive accuracy using leave-  
684 one-out cross validation (LOO-CV) with *Pareto-smoothed importance sampling* (PSIS) (32). The  
685 pointwise log-likelihood `log_lik` was computed in the `generated quantities` block in Stan  
686 during MCMC sampling. We used the `loo()` function from the *loo* R package (version 2.5.1),  
687 which computes the expected log-pointwise predictive density (ELPD) using PSIS.

688

## 689 Calculation of transcription velocities

690 To calculate transcription velocities, we took advantage of ongoing transcription of RNA  
691 polymerase already bound to DNA in the RIF-seq data. We split the genome into 60 base  
692 subgenic windows, and extracted the corresponding elongation times and decay rates using the  
693 log-normal model. We split the dataset into five subsets before running the MCMC sampler (1  
694 chain:method=sample num\_samples=1000 num\_warmup=1000 adapt\_delta=0.95  
695 algorithm=hmc engine=nuts max\_depth=15). Subsequently, we verified that the  
696 hierarchical parameters agreed well between the five subsets. The resulting transcription  
697 elongation times  $\gamma$  were combined with operon annotations taken from (42). We fitted a linear  
698 model with y-intercept  $a_g$  and slope  $b_g$  to the elongation times of operons or individual  
699 transcripts as shown for the *mra/fts* operons in **Figure S3C**, using the inverse of the 68%  
700 credible intervals of  $\gamma_g$  as obtained from the MCMC samples as weights (example: Fig. 2E). The  
701 transcription velocity  $v_g$  is given by the ratio of the window size ( $s_{seg} = 60$  nt) and the slope  $b_g$ .  
702 Its error was calculated via error propagation  $\Delta v_g = \Delta b_g / (s_{seg} \cdot b_g^2)$ . We obtain 772 operons with  
703 at least 7 nonzero segments which fulfill the quality criterium  $\Delta v_g / v_g < 0.75$ .

704

## 705 Calculation of Bayesian p-values

706 The half-lives were calculated from the decay rates  $t_{1/2,gc} = \ln(2) / \beta_{gc}$ . In order to calculate  
707 Bayesian p-values, we tested against the null hypothesis that the difference in half-life  $\Delta t_{1/2,c} =$   
708  $t_{1/2,c} - t_{1/2,WT}$  is compatible with zero. There is a limit as to how precisely we measured the WT  
709 half-lives. We determined the minimum of the 90% credible intervals of the WT half-lives  
710 (~0.05). Assuming that we cannot measure a difference in half-life with higher precision than the  
711 WT half-lives, we selected the interval [-0.05, 0.05] as the null hypothesis. The p-value  $p_{gc}$  for  
712 gene  $g$  in condition  $c$  corresponding to the difference in decay rate  $\Delta t_{1/2,gc}$  is given by the  
713 fraction  $|S_0|/|S|$  of MCMC samples  $S = \{s_1, \dots, s_{2000}\}$  that agrees with the null hypothesis  
714 (**Figure S4A**):

715 For  $\Delta t_{1/2,gc} > 0$ , the samples  $S_0 = \{s \in S | s \leq 0.05\}$  agree with the null hypothesis.

716 For  $\Delta t_{1/2,gc} < 0$ , the samples  $S_0 = \{s \in S | s \geq -0.05\}$  agree with the null hypothesis.

717 We compared the distribution of p-values to the distribution of p-values under the null  
718 hypothesis which was obtained by bootstrapping from the distribution of MCMC samples of the  
719 WT half-lives and calculating the corresponding p-values (**Figure S4B**).

720

## 721 Calibration of posterior predictive p-values

722 In order to assign a false-discovery rate (FDR) to the p-values, we simulated a dataset with  
723 4000 transcripts, 3 conditions ( $WT, c_1, c_2$ ) with time points 0, 3, 6, 12, 24 and 2 conditions ( $WT,$   
724  $c_3$ ) with time points 0, 2, 4, 8, 16. We drew samples from the following distributions (which we  
725 extracted from fitting the LNM to the two RIF-seq data sets), using the definition of the LNM as  
726 given above:

727 Relative log-counts  $y_{gcr}(t) \sim \mathcal{N}(\mu_{gc}(t), \sigma_g(t))$

728 WT decay rate  $\beta_{g,WT} \sim \mathcal{N}(0.75, 0.3)$

729 Elongation time  $\gamma_g \sim \mathcal{C}_{\geq 0, \leq 12}(0, 2)$

730 Standard deviation of log-counts  $\sigma_g \sim (0.35, 0.25)$

731 Difference in decay rate  $\Delta \beta_{gc} = \beta_{gc} - \beta_{g,WT} \sim \mathcal{N}(0, 0.08)$

732 Baseline parameter  $\pi_{gc} \sim \mathcal{N}(0, 0.05)$

733 Mean of relative log-counts

734 
$$\mu_{gc}(t) = \ln [\pi_{gc} + (1 - \pi_{gc}) \exp(-\Theta(t - \gamma_g)\beta_{gc} \cdot (t - \gamma_g))]$$

735 Then, we fitted the log-normal model to this dataset. Simulated absolute differences in half-life  
736 below 0.05 ( $|\Delta t_{1/2,gc}| \leq 0.05$ ) were assumed to agree with the null hypothesis. The Pearson  
737 correlation of 0.86 between simulated and fitted differences in half-life were obtained using the  
738 `weightedCorr` function from the `wCorr` package in R with the inverse of the size of the 90%  
739 credible intervals of the fitted half-lives as weights (**Figure S4C**). We calculated the posterior  
740 predictive p-values for the fitted differences in half-life and varied the p-value cutoff between 0  
741 and 1 with step size 0.01. The corresponding FDR is given by the fraction of transcripts whose  
742 simulated difference in half-life agrees with the null hypothesis and the total number of  
743 transcripts with a p-value below the cutoff. Subsequently, we fitted a LOESS curve in R  
744 (`span=0.2`) to determine the FDR corresponding to any p-value cutoff (**Figure S4E, Table S1**)  
745 A p-value of 0.082 corresponds to a FDR of 0.1 which we used as a cutoff for our analysis of  
746 differentially decaying transcripts. In addition to controlling the FDR, we verified that at an FDR  
747 of 0.1, the log-normal model identifies differentially decaying transcripts with a low simulated  
748 standard deviation on log-counts  $\sigma_g$  with high sensitivity (**Figure S4D**). For this, we selected five  
749 cutoffs on standard deviation (0.05, 0.1, 0.2, 0.4, 1) and calculated the false positive rate (FPR)  
750 and sensitivity for all transcripts below the cutoff.

751

#### 752 **Ratio between differential gene expression and stability in $\Delta proQ$ vs. $\Delta cspCE$**

753 The ratio between the differences in RNA half-life in the  $\Delta proQ$  and  $\Delta cspCE$  mutant strain (as  
754 compared to WT) was calculated by selecting only transcripts with significant stability changes  
755 in the same direction in the two RBP deletion strains (**Figure S9C**). Similarly, we selected only  
756 genes with significant log<sub>2</sub>-fold changes in the same direction in both RBP deletion strains  
757 (**Figure 4F**).

758

#### 759 **Hydrogen peroxide exposure**

760 Bacterial cultures of all strains (*Salmonella* WT,  $\Delta proQ$ , *proQ++* and  $\Delta oxyRS$ ) were grown  
761 overnight. All strains contain the pJV300 plasmid. 10 mL of culture were inoculated 1:1000 in LB  
762 and grown at 37°C for 5 h. The cultures were then diluted 1:100 in 10 mL of LB and incubated  
763 for 2 h at 37°C with 1.5 mM or 2 mM of H<sub>2</sub>O<sub>2</sub>. Controls were incubated without H<sub>2</sub>O<sub>2</sub>. Viability of  
764 the cells was assessed by spotting 5  $\mu$ L of a dilution series ( $10^0, \dots, 10^{-6}$ ) on LB agar plates  
765 which were then incubated overnight at 37°C.

766

#### 767 **RNA secondary structure**

768 The ViennaRNA web server with default settings was used to obtain the secondary structures of  
769 RNA sequences (67). Forna (68) was used for visualization.

770

#### 771 **Geneset enrichment analysis**

772 In order to identify pathways with transcripts either stabilized or destabilized in the absence of  
773 ProQ or CspCE, the genes in the analysis were ranked according to the quantity

774  $-sgn\left(\Delta t_{\frac{1}{2}}\right) \log_{10}(p + 10^{-4})$ . For pathway analysis of log fold-changes, we used the quantity

775  $-sgn(\log FC) \log_{10}(p)$  for ranking. We created a gene set database combining the terms for the

776 strain SL1344 from the eggNOG database (69), QuickGo (70) and KEGG (71). We used the R  
777 package GSEA 1.2 (43) to calculate the enrichment scores and the corresponding adjusted p  
778 values. `gsea.type` was set to 'preranked' and `shuffling.type` to 'gene.labels'. Gene sets with  
779 sizes between 3 and 50 genes were analyzed. For the CLIP-seq data, we performed a  
780 hypergeometric test with the R stats function `fisher.test`. The FDR corrected p value was  
781 obtained using the Benjamini Hochberg procedure. For the hypergeometric test, the significance  
782 cutoff on the CLIP-seq data was chosen as ( $p_{adj} \leq 0.1$ ) for CsrA, Hfq, and ProQ. For CspC/E,  
783 the value was reduced to  $p_{adj} \leq 0.01$  to obtain a comparable number of interaction partners.

784

### 785 **Correlation between changes in half-lives or transcript abundance in different mutant** 786 **backgrounds and its significance**

787 To compare the changes in half-life or transcript abundance in the  $\Delta proQ$  and  $\Delta cspCE$  strains,  
788 we used all transcripts with an  $FDR \leq 0.1$  in both deletion mutants as compared to WT. The  
789 Pearson correlation was calculated using R's `cor` function. To calculate the significance of the  
790 correlation, we permuted gene labels of the results for the  $\Delta cspCE$  strain and applied the same  
791 criteria to obtain the correlations. This was repeated 1000 times. The fraction of permutations  
792 with a correlation larger than in the actual comparison between the  $\Delta proQ$  and  $\Delta cspCE$  strains  
793 was used as an estimate for the significance of the observed correlation (**Figure S8D**).

794 For the comparison between changes in transcript abundance in the  $\Delta arcA$  strain and  
795 the two RBP deletion strains (always compared to WT), all transcripts with differential gene  
796 expression in the  $\Delta arcA$  strains were used (44). To map locus tags from the *S. Typhimurium*  
797 LT2 genome (NCBI Accessions: AE006468.2, AE006471.2) to the SL1344 genome, we used  
798 `proteinortho` (v6.0.33) (72). The significance of the correlation between the published difference  
799 in transcript abundance and the differences in the RBP deletion strains were estimated by  
800 permuting gene labels 1000 times in the  $\Delta arcA$  strain and calculating the corresponding  
801 correlations (**Figure S9C**).

802

### 803 **RNase E cleavage sites in random sequences**

804 To estimate expected overlap between CspC/E CLIP-seq peaks and RNase E cleavage sites,  
805 we generated 100 random peaks of the same length within the same transcript as the actual  
806 CspC/E CLIP-seq peak, then tested how many of these random peaks overlapped with RNase  
807 E cleavage sites. Across the 100 simulations, this resulted in a mean of 331 of overlapping  
808 binding sites compared to 410 overlapping sites in the CspC/E CLIP-seq peaks. None of the  
809 100 simulated sets yielded a value as high or higher than 410 overlapping binding sites,  
810 resulting in a p value of about 0.

811

### 812 **Cumulative ratio of transcripts bound by RBPs**

813 To visualize the relationship between the fraction of transcripts bound by RBPs and transcript  
814 half-life (**Figure 4A**), we calculated the cumulative ratio  $R_{cum}$  of transcripts bound by one of the  
815 RBPs in this study (ProQ, CspC/E, CsrA, Hfq). For every RBP, we divide the set of transcripts  $T$   
816 into transcripts bound and not bound by the respective RBP, i.e.

817

$$T = T_b \cup T_{ub}.$$

818

819 Subsequently, each set is ordered by half-life. Starting with the least stable transcript, the  
cumulative ratio of the  $i$ th transcript is given by



$$R_{cum,i} = \frac{|\{T_b | t_{1/2} \leq t_{1/2,i}\}|}{|\{T | t_{1/2} \leq t_{1/2,i}\}|}$$

820

821

## 822 **UV Crosslinking, Immunoprecipitation, and RNA Purification**

823 CspC/E CLIP-seq data sets were generated with the same protocol as (12, 42). In short, 400mL

824 of bacterial culture was grown to an OD<sub>600</sub> of 2.0 in three biological replicates. One half of the

825 culture was irradiated with UV-C light at 800 mJ to induce RBP crosslinking. Cells were

826 centrifuged and resuspended in lysis buffer, mixed with 1 ml glass beads and shaken for 10

827 minutes. Anti-FLAG magnetic beads were added to the lysate before rotating it for 1 hour at 4°C.

828 The beads were collected by centrifugation, resuspended and subjected to multiple washing

829 steps. Finally, the magnetic beads were collected on a magnetic separator and the supernatant

830 was loaded and separated on a 15% SDS-polyacrylamide gel followed by transfer to a

831 nitrocellulose membrane. The protein size marker was highlighted with a radioactively labeled

832 marker pen, and the membrane was exposed to a phosphor screen for 30 min. The regions of

833 the membrane containing radioactive signal were cut out, and the same regions were selected

834 from the control samples (**Figure S7A**). The membrane pieces were cut into smaller pieces and

835 incubated 1hr at 37°C with shaking at 1000 rpm in a total volume of 400 µl of PK solution (200 µl

836 of 2xPK buffer - 100mM Tris-Hcl pH 7.9; 10mM EDTA; 1% SDS - ;20 µl of Proteinase K

837 (Fermentas, 20 mg/ml); 1 µl of SupraseIN (Termo Fischer Scientist) completed with nuclease-

838 free water up to 400 µl). After incubation, 100 µl of the PK solution containing 9M Urea was

839 added to each tube and incubated for an additional 1hr at 37°C, 1000 rpm. For RNA extraction,

840 phase-lock tubes (5PRIME) were used to mix 450 µl of Phenol:Chloroform:Isoamyl alcohol

841 25:24:1 (PCI; Roth) with the supernatant from proteinase K treated samples (around 450 µl).

842 Phase lock tubes were incubated 5 min at 30°C under agitation (1000rpm) and spined 15 min at

843 4°C, 13 000rpm. The aqueous phase was collected and precipitated using a 30:1 mix of 100%

844 ethanol/3M Sodium Acetate pH 5.2 at -20°C for at least 2hr. After 30min centrifugation at 4°C, 13

845 000rpm, the RNA pellets were washed with 70% ethanol and finally resuspended in 10 µl of

846 nuclease-free water.

847

## 848 **CLIP-seq cDNA Library Preparation and Sequencing**

849 cDNA libraries were prepared using the NEBnext Multiplex Small RNA library kit (#E7300)

850 according to the manufacturer's recommendation. Briefly, for the 3' SR adaptor ligation step, 2.5

851 µl of RNA sample extracted from CLIP elution was mixed with 1 µl of 3'SR adaptor, diluted 1:10

852 in nuclease-free water), incubate in thermal cycler 2min at 70°C. While on ice, a mix of 5 µl of 3'

853 ligation reaction buffer and 1.5  $\mu$ l 3' ligation enzyme mix was added, and the samples were  
854 incubated for 1 hr at 25°C. For the RT primer hybridization, 2.75  $\mu$ l of a 1:10 diluted SR RT  
855 primer was added to the samples following an incubation of 5 min at 75°C, 15 min at 37°C and  
856 15 min at 25°C. During incubation period, 0.5  $\mu$ l of a 1:20 5' adaptor was incubated separately  
857 for 2 min at 70°C. This denatured 5' adaptor was used for the 5' SR adaptor ligation step where  
858 it was added to the samples with 0.5  $\mu$ l of 10X 5' ligation reaction buffer and 1.25  $\mu$ l of 5' ligation  
859 enzyme mix. The samples were then incubated for 1 hr at 25°C. For the final step, reverse  
860 transcription, to each sample was added 4  $\mu$ l of first strand synthesis reaction buffer, 0.5  $\mu$ l of  
861 murine RNase inhibitor and 0.5  $\mu$ l of M-MuLV reverse transcriptase. The samples were  
862 incubated for 1 hr at 50°C and the RT enzyme later on inactivated at 70°C for 15 min. For the  
863 cDNA amplification, 10  $\mu$ l of each cDNA library was mixed with 25  $\mu$ l of LongAmp Taq 2x Master  
864 mix, 1.2  $\mu$ l of SR primer, 12.5  $\mu$ l of nuclease free water and 1.2  $\mu$ l of index primer (one different  
865 for each library). Amplification conditions applied were the following: 94°C for 30 sec; 18 cycles  
866 of 94°C/15sec; 62°C/30sec; 70°C/15sec and a final step of 70°C for 5 min. After amplification,  
867 samples were loaded of TBE gels and bands from amplification between 130 to 200 bp were  
868 selected by gel extraction. DNA was eluted from crushed gel pieces with 500  $\mu$ l of DNA elution  
869 buffer after 2 hr incubation at RT. After collection of the supernatant using corning costar spin-X  
870 centrifuge tube filters, precipitation mix was added, and samples were placed at 80°C for 1 hr.  
871 After centrifugation and washing steps, dried pellets were resuspended in nuclease free water.  
872 Size, quantity, and absence of primers dimers were checked by bioanalyzer before sequencing.  
873 High-throughput sequencing was performed by Vertis. The libraries were pooled on an Illumina  
874 Nextseq500 platform and sequencing done for single end 1x150 bp.

875

### 876 **Processing of Sequence Reads and Mapping CLIP-seq**

877 The CspC/E and ProQ CLIP-seq data was analyzed following the procedure described in (42)  
878 with a few alterations. First, putative PCR duplicates were removed using FastUniq v1.1 (73).  
879 The read pairs were trimmed together using Cutadapt v4.1 (74) and reads with fewer than 12  
880 remaining bases were discarded. Additionally, we performed quality trimming with a minimum  
881 phred score of 20. Read pairs longer than 25 nt were eliminated for peak calling. The remaining  
882 reads were mapped to the Salmonella Typhimurium SL1344 chromosome (NCBI Acc.-No:  
883 NC\_016810.1) and plasmid (NCBI Acc.-No: NC\_017718.1, NC\_017719.1, NC\_017720.1)  
884 reference sequences using segemehl version 0.3.4 (75) with an accuracy cutoff of 80%. Only  
885 uniquely mapping reads were considered for all subsequent analysis. For quantification of peak  
886 regions, no upper limit was imposed on read length. Reads were aligned to the Salmonella

887 Typhimurium SL1344 chromosome and plasmids using STAR (63).

888

### 889 **CLIP-seq Peak Calling**

890 Segemehl read alignments were converted from BAM to BED format using BEDTools v2.17.0  
891 and reformatted to satisfy blockbuster's input requirements. Subsequently, peaks were defined  
892 by applying blockbuster v0.0.1.1 (-minBlockHeight 10 -distance 1). This resulted in a large set of  
893 clusters with overlapping blocks of reads. In clusters with only one block the peak region was  
894 defined by the position of the block. In clusters with multiple blocks, peaks were chosen  
895 iteratively. First, the block with the highest count was selected and a peak region was defined by  
896 joining together all blocks which overlapped by at least 50% with this block. Then, all reads  
897 overlapping with this block were removed. This procedure was repeated until the largest block  
898 contained less than 1% of the reads in the corresponding cluster. A formalized description of  
899 this algorithm is given in (42). The peaks were exported to gff format and htseq-count v2.0.2  
900 with default parameters was used to count the uniquely mapped reads in the STAR alignments.

901

### 902 **Differential peak abundance analysis of CLIP-seq Data**

903 DEseq2 (25) was used to identify peaks with differential abundance in the cross-linked vs. the  
904 non-cross-linked libraries. Log-fold changes were shrunk using apeglm (76). We required a log-  
905 fold change of at least 1. For ProQ, we chose the same adjusted p-value cutoff as (42) chose  
906 for CsrA and Hfq ( $p_{adj} < 0.1$ , **Figure S7B**). For the CSPs, the adjusted p-value cutoff was  
907 reduced to 0.01 to obtain a comparable number of peaks (**Figure S7C**).

908

### 909 **Supplementary Material**

910

911 **Table S1:** Half-lives obtained by fitting the LNM to the RIF-seq data set.

912 **Table S2:** Steady-state log-fold changes of the RIF-seq data set from edgeR.

913 **Table S3:** Genetic features with ProQ-binding sites (CLIP-seq) in the 3'UTR or within 100 bases of the  
914 stop codon which are destabilized upon *proQ* deletion.

915 **Table S4:** Genetic features with CspC/E-binding sites (CLIP-seq) in the CDS or 5'UTR which are  
916 destabilized upon *cspC/E* deletion.

917 **Table S5:** Significant ProQ peaks obtained by re-analyzing the ProQ CLIP-seq data set (12).

918 **Table S6:** Significant CspC CLIP-seq peaks.

919 **Table S7:** Significant CspE CLIP-seq peaks.

920 **Table S8:** Bacterial strains used in this study.

921 **Table S9:** Plasmids used in this study.

922 **Table S10:** Oligos used in this study.

923 **Table S11:** Antibodies used in this study.

924

925

926

927

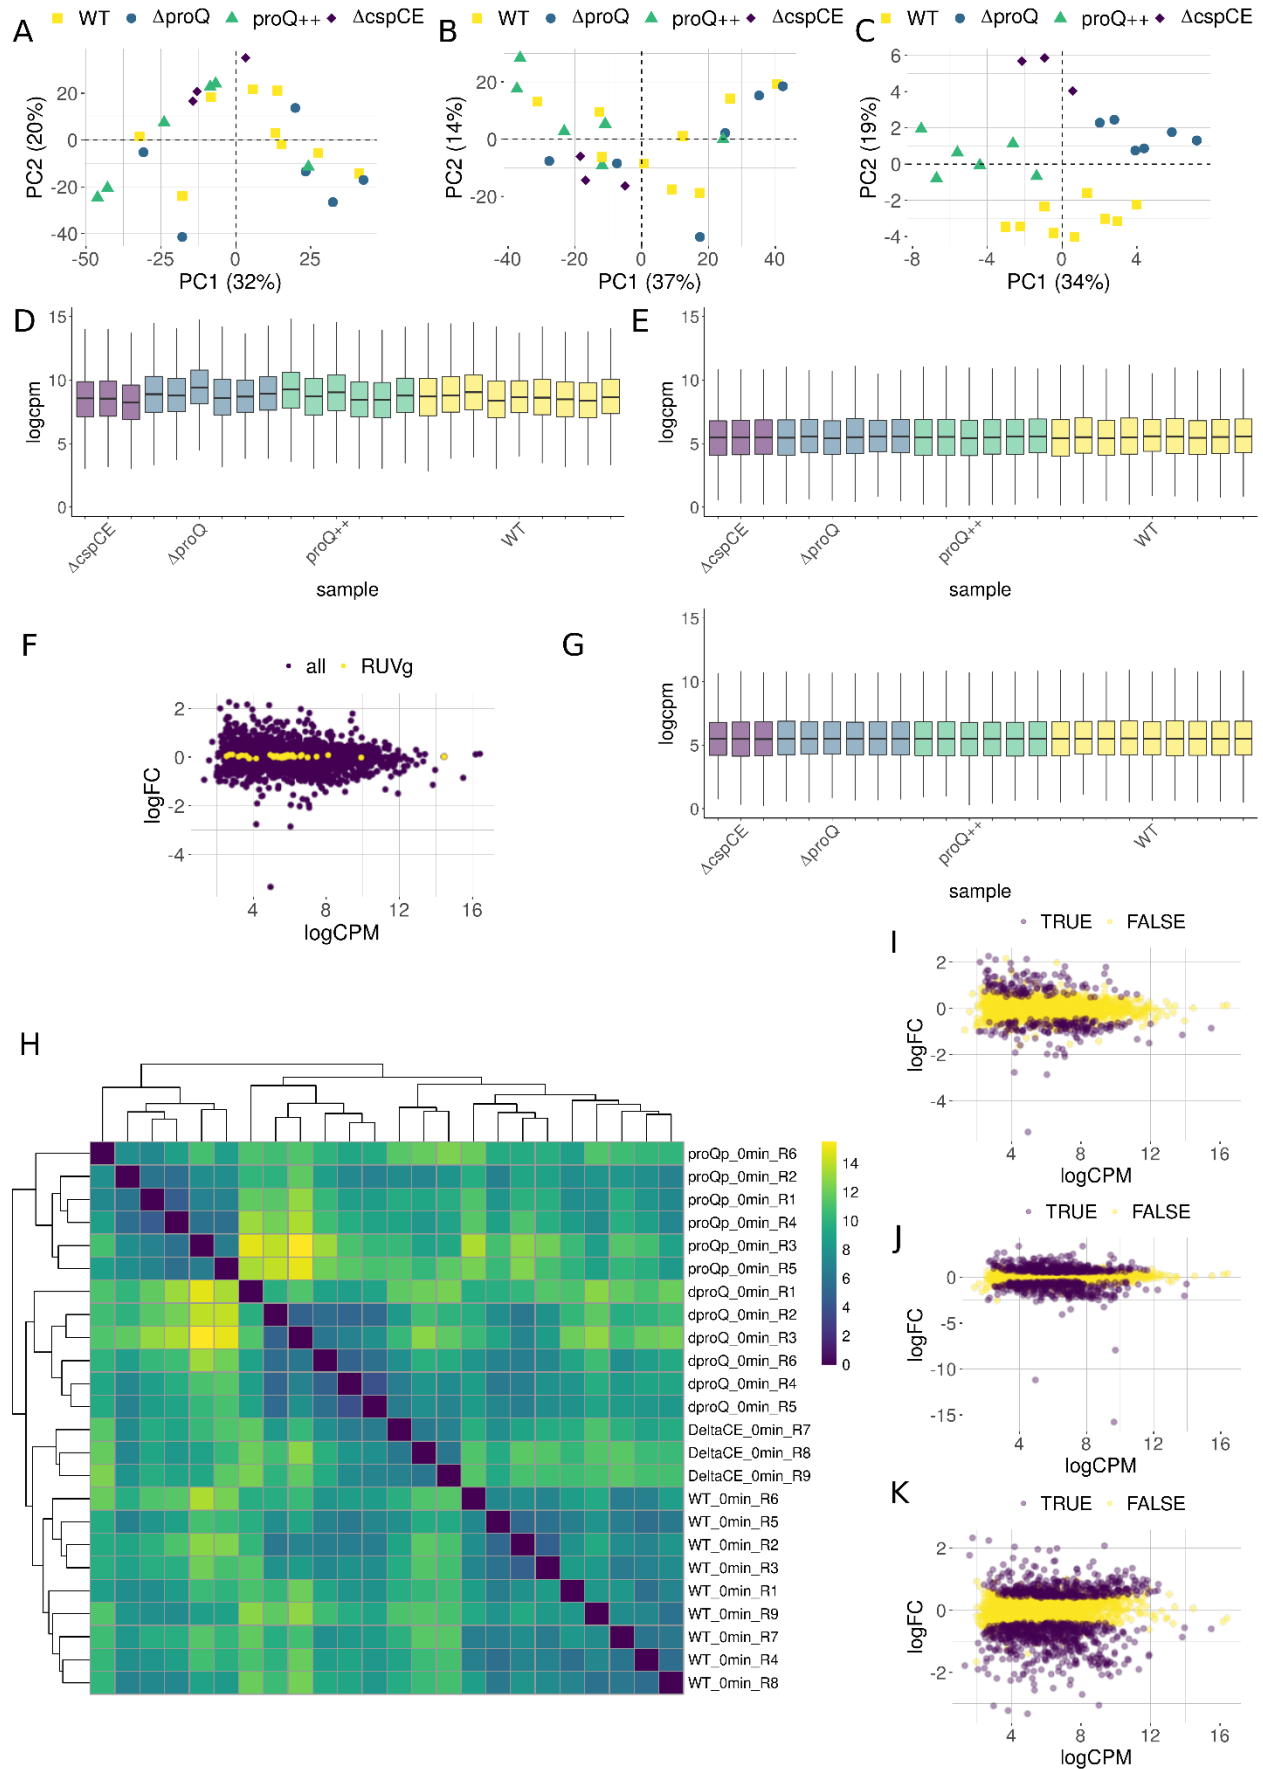

929 **Figure S1. Differential expression (DE) analysis at t=0 min**

930 (A) PCA plot after normalizing by library size. (B) PCA plot after TMM normalization. (C) PCA plot after  
931 running RUVg. (D) logcpm values after normalizing by library size. (E) logcpm values after TMM  
932 normalization. (F) MA plot  $\Delta proQ$  vs. WT after TMM normalization. Genes used in RUVg are marked in  
933 yellow. (G) logcpm values after running RUVg. (H) Samples clustered by euclidean distance after running  
934 RUVg. (I-K) MA plots for  $\Delta proQ$ ,  $proQ^{++}$ , and  $\Delta cspCE$  (top to bottom) vs. WT after normalization with  
935 RUVg. Significantly DE genes (FDR < 0.05) are highlighted.

936

937

938

939

940

941

942

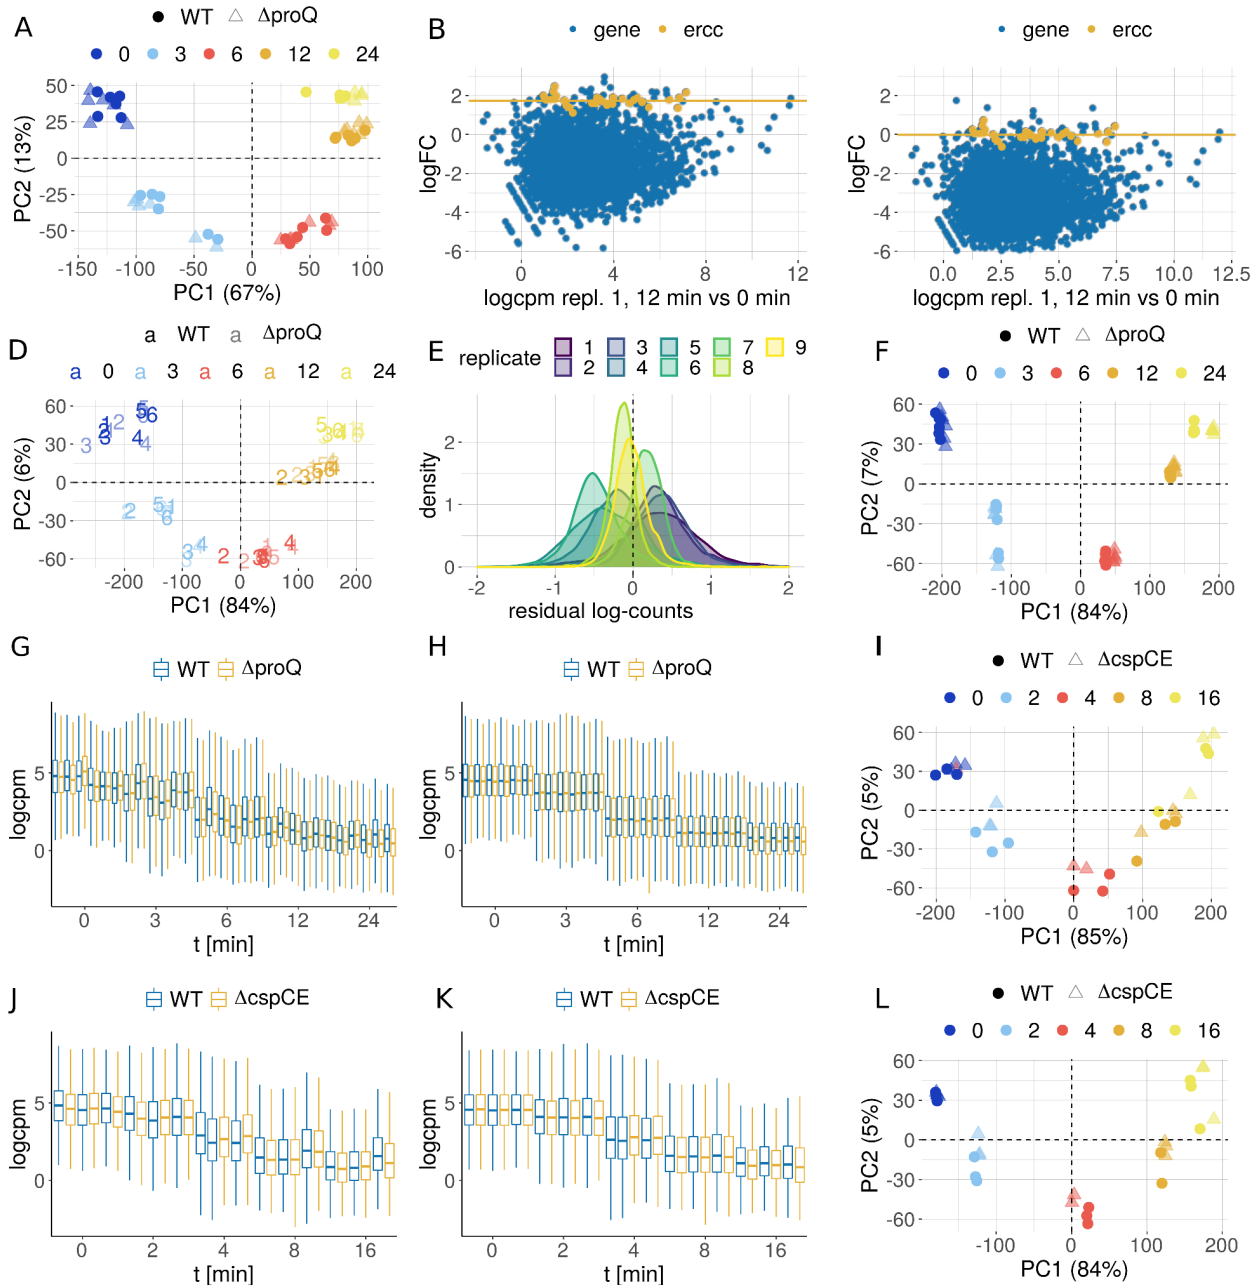

943

944

### Figure S2. Normalization

945 (A) PCA plot of the raw proQ RIF-seq data. (B) Representative MA plot before TMM normalization with

946 ERCC spike-ins. (C) Representative MA plot after TMM normalization with ERCC spike-ins. (D) PCA plot

947 after normalization with ERCC spike-ins. (E) Illustration of the CM normalization for WT at  $t = 0$  min: After

948 subtracting the condition-wise mean, the offset of the mean from 0 provides an additional normalization

949 constant. (F) PCA plot after center-mean (CM) normalization. (G) Relative log-expression (RLE) of WT

950 and  $\Delta proQ$  libraries after TMM normalization. (H) RLE of WT and  $\Delta proQ$  libraries after CM normalization.

951 (I) PCA plot after TMM normalization with ERCC spike-ins. (J) RLE of WT and  $\Delta cspCE$  libraries after

952 TMM normalization. (K) RLE of WT and  $\Delta cspCE$  libraries after CM normalization. (L) PCA plot after

953 center-mean (CM) normalization.

954

955

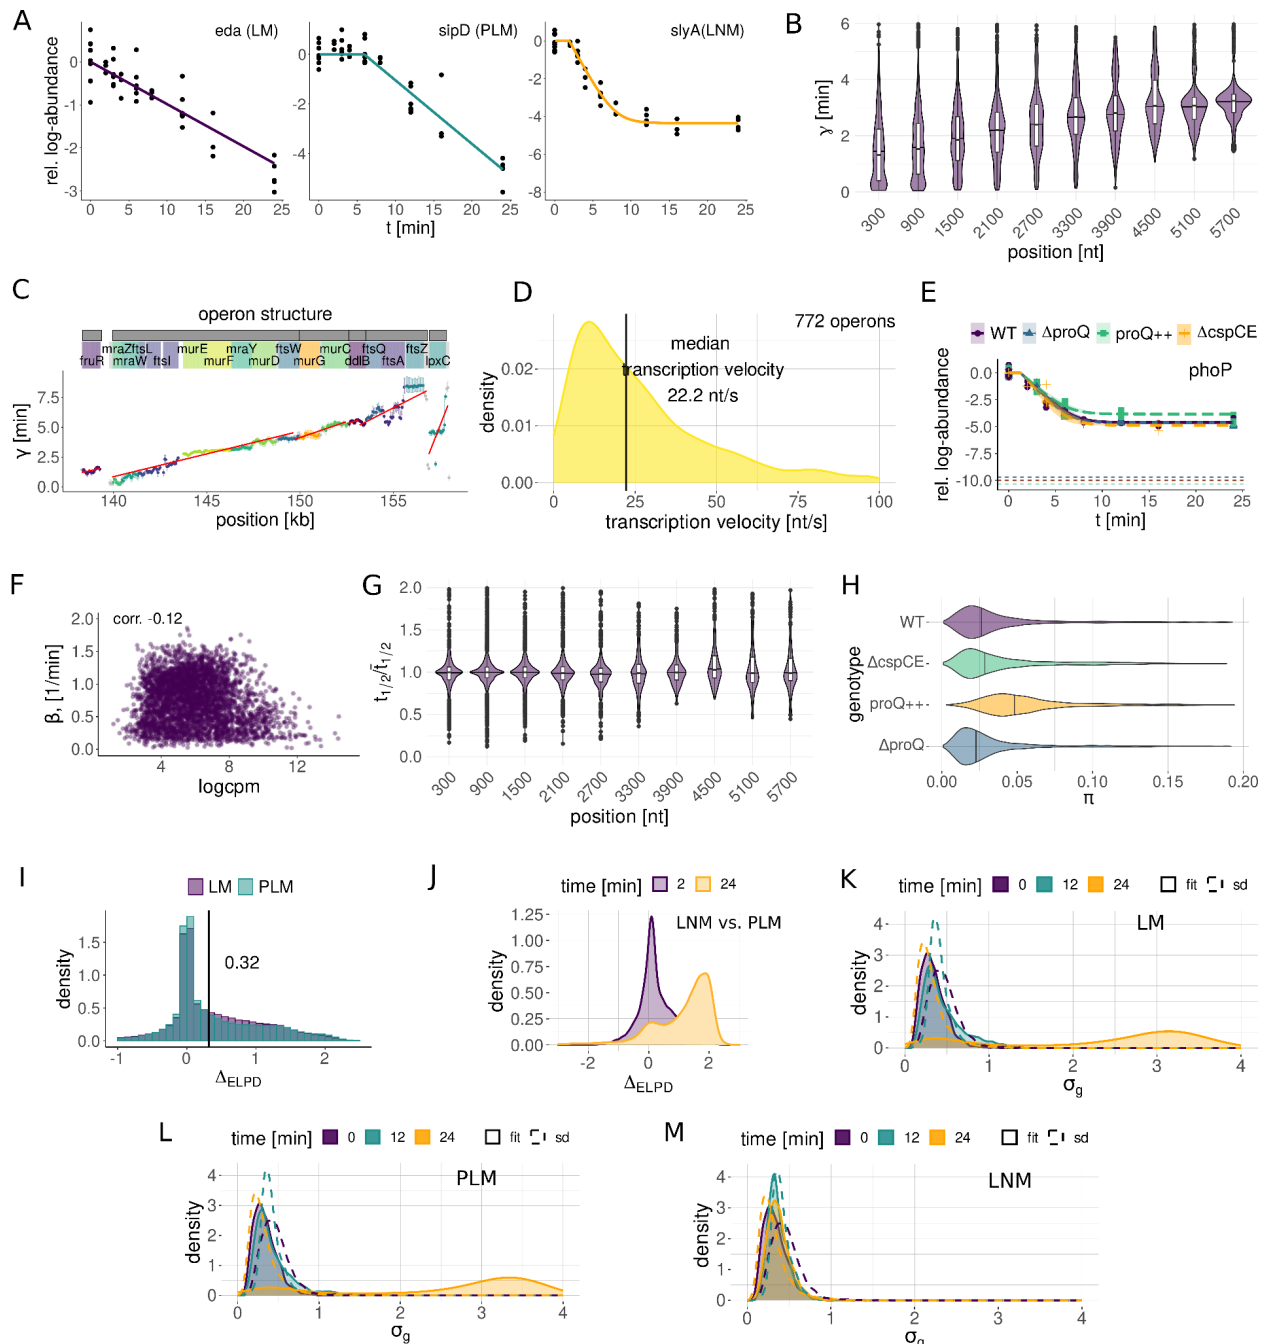

956

957

**Figure S3. Model development, global transcript stability and transcription rate**

958

(A) Representative WT decay curves exhibiting the dynamics correctly described by either the LM, PLM

959

or LNM. (B) Genome-wide association of elongation time  $\gamma$  with the annotated primary transcription start

960

sites. (C) An example of how the transcription rate was extracted from the elongation times of the 60 base

961

windows including annotations and operon structure based on (64), where primary TSSs are indicated by

962

black lines. (D) Distribution of genome-wide transcription rates as extracted from the 60 base windows.

963

(E) Comparison of decay curves and detection limit due to adding a pseudocount for the *phoP* transcript.

964

(F) Scatter plot of gene expression and decay rate. (G) Half-lives of the 60 base windows scaled to the

965

gene-average relative to the start of the CDS. (H) Distribution of genome-wide stable baseline fraction  $\pi$



966 ordered by genotype. (I) Difference between ELPD of the LNM and the LM/PLM, respectively. Positive  
967 values favor the LNM. (J) Difference in ELPD between the LNM and the PLM at 24 min. Positive values  
968 favor the LNM. (K) Fitted unexplained variation  $\sigma_g(t)$  in the LM compared to calculated standard  
969 deviation. (L) Fitted unexplained variation  $\sigma_g(t)$  in the PLM compared to calculated standard deviation.  
970 (M) Fitted unexplained variation  $\sigma_g(t)$  in the LNM compared to calculated standard deviation.

971  
972  
973  
974  
975  
976  
977  
978  
979  
980  
981  
982  
983  
984  
985  
986  
987  
988  
989  
990  
991  
992  
993

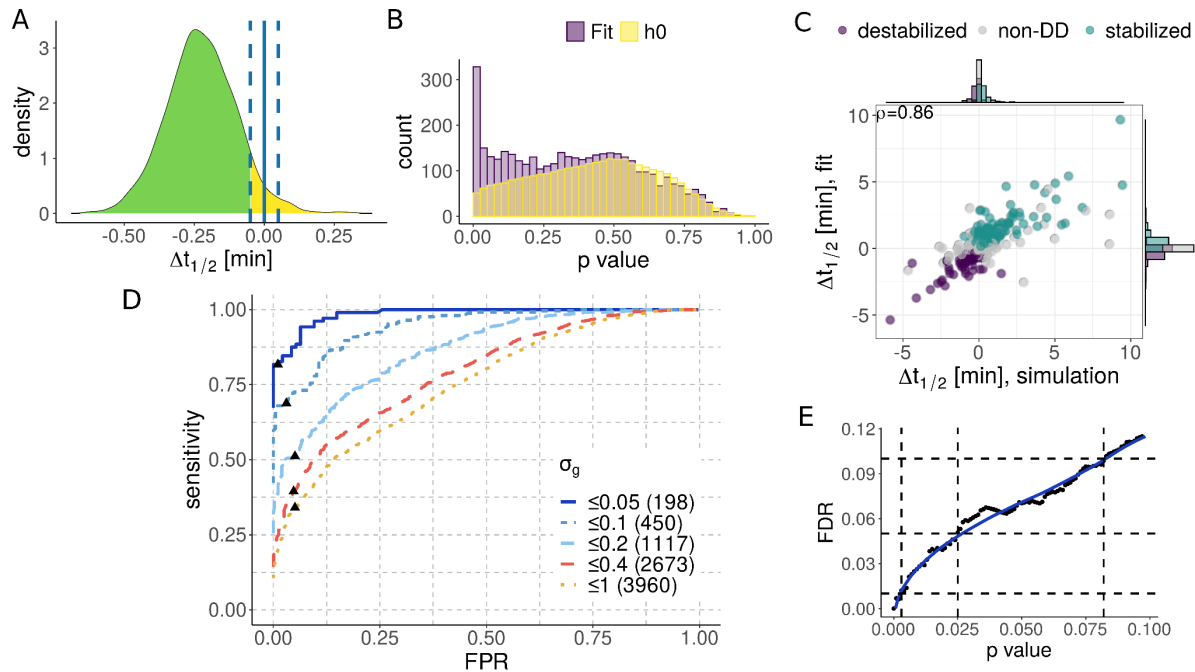

994  
995  
996  
997  
998  
999  
1000  
1001  
1002  
1003  
1004  
1005  
1006

**Figure S4. Posterior predictive p values und false discovery rate (FDR)**

(A) Posterior distribution of the difference in half-life for a transcript in the RBP deletion strain vs. the WT. Under the null hypothesis, MCMC samples should fall within an interval around zero (blue, dashed lines). The Bayesian p value is given by the fraction of samples that overlap with the null hypothesis (yellow). (B) p value distribution for differential stability data for the  $\Delta proQ$  strain compared to the distribution under the null hypothesis. (C) Correlation between simulated and fitted differences in half-life (Pearson  $\rho = 0.86$ ). (D) ROC curves obtained from the simulated data for different simulated standard deviations of relative log-counts. An FDR of 0.1 is marked with a black triangle. The number of transcripts which pass the cutoff is indicated in parentheses. At an FDR of 0.1, differentially decaying transcripts with a simulated standard deviation below 0.05 are identified with a sensitivity of 0.82. (E) We determine the FDR at a given p value cutoff from the simulated data (black dots) and fit a LOESS curve to it to map p values to FDR (blue line). More details on the calibration of p values can be found in the *Methods*.

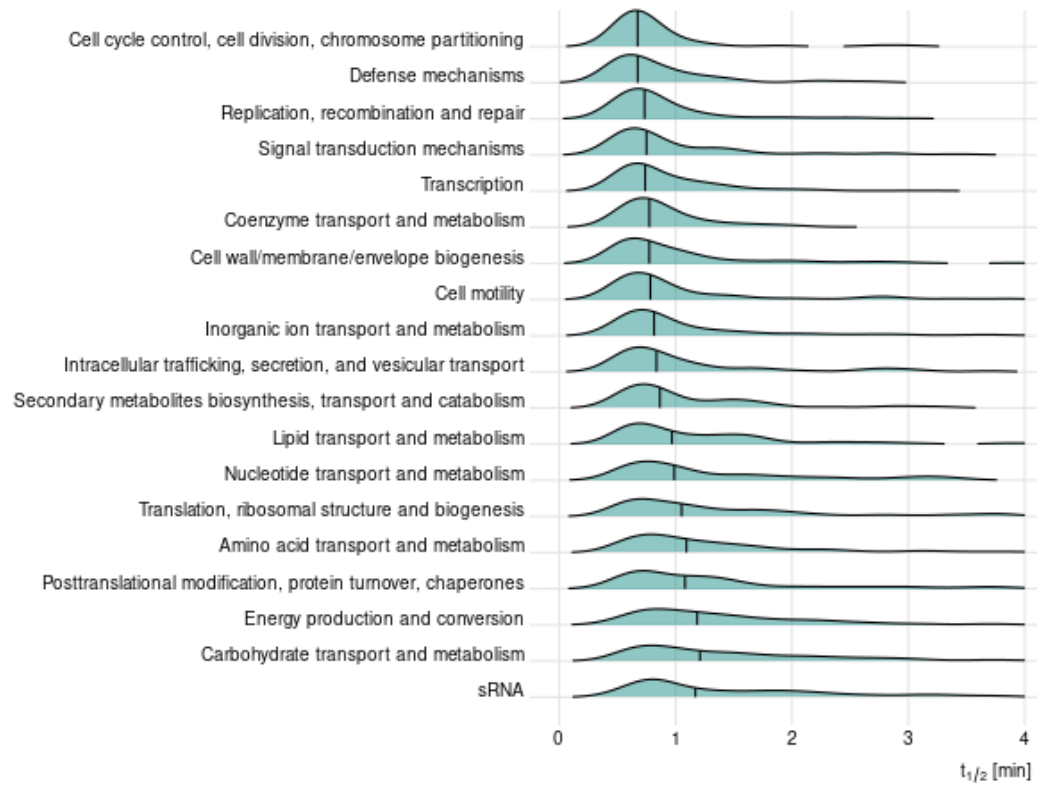

1007  
1008  
1009

**Figure S5. Median half-lives for transcripts classified by COG category.** Related to figure 1F.

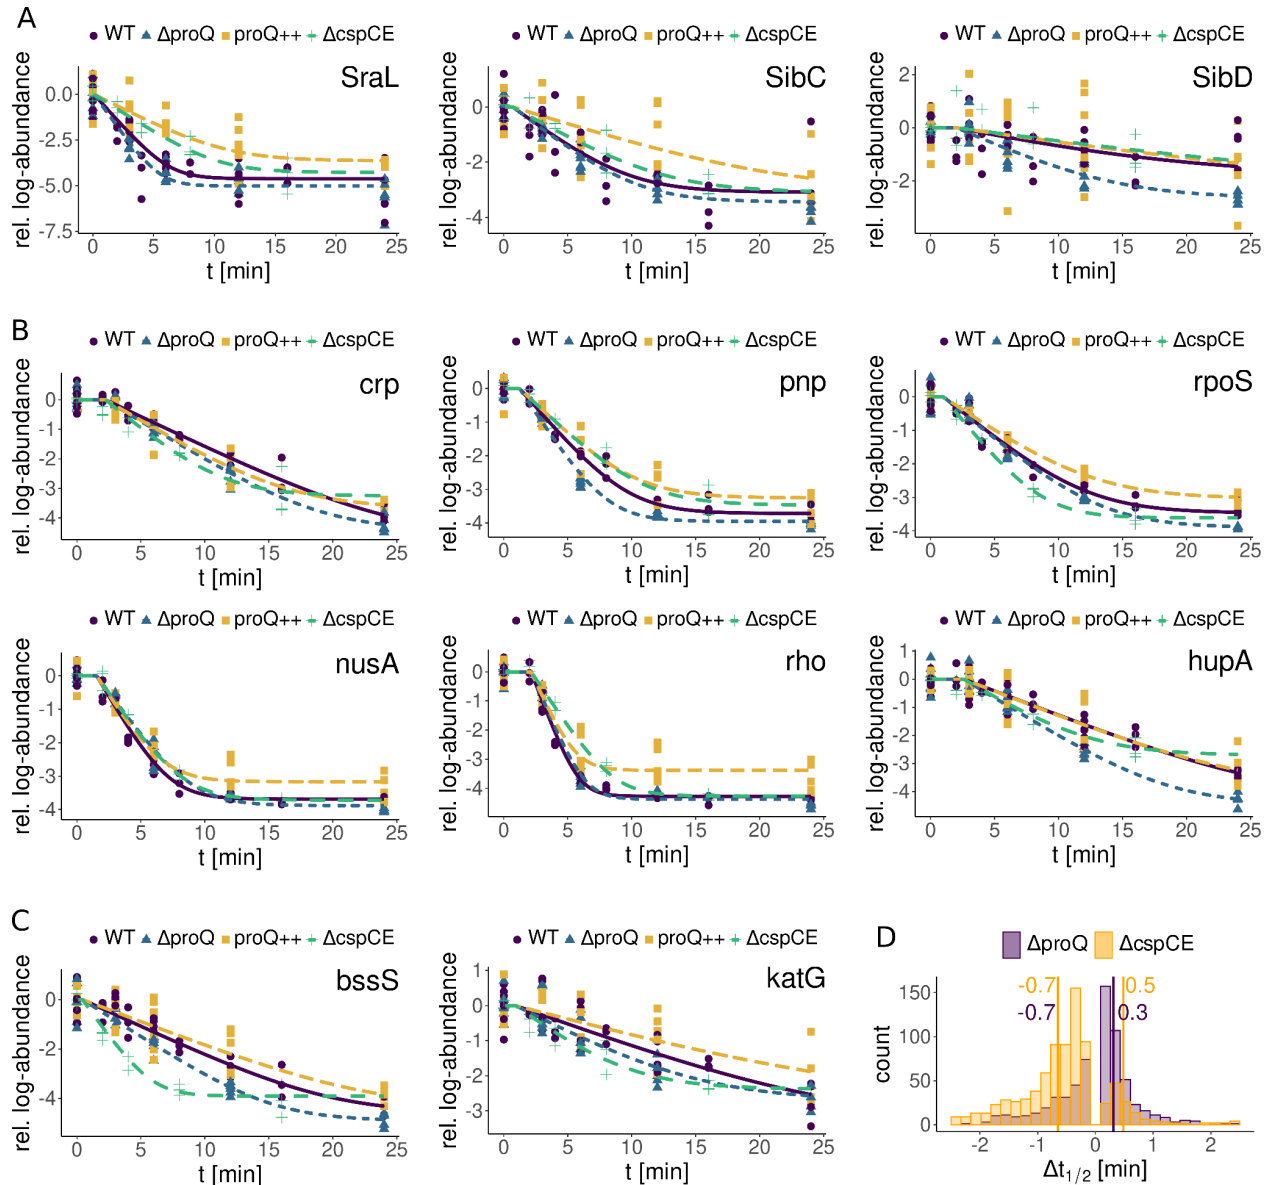

1010  
1011  
1012  
1013  
1014  
1015  
1016

**Figure S6. Representative RIF-seq results**

(A) Stability changes for known ProQ targets. (B) Stability changes for the exoribonuclease PNPase and global transcriptional regulators. (C) Transcripts with large stability changes upon deletion of *proQ* and *cspCE*. (D) Distribution of significant stability changes in the two RBP deletion mutants.

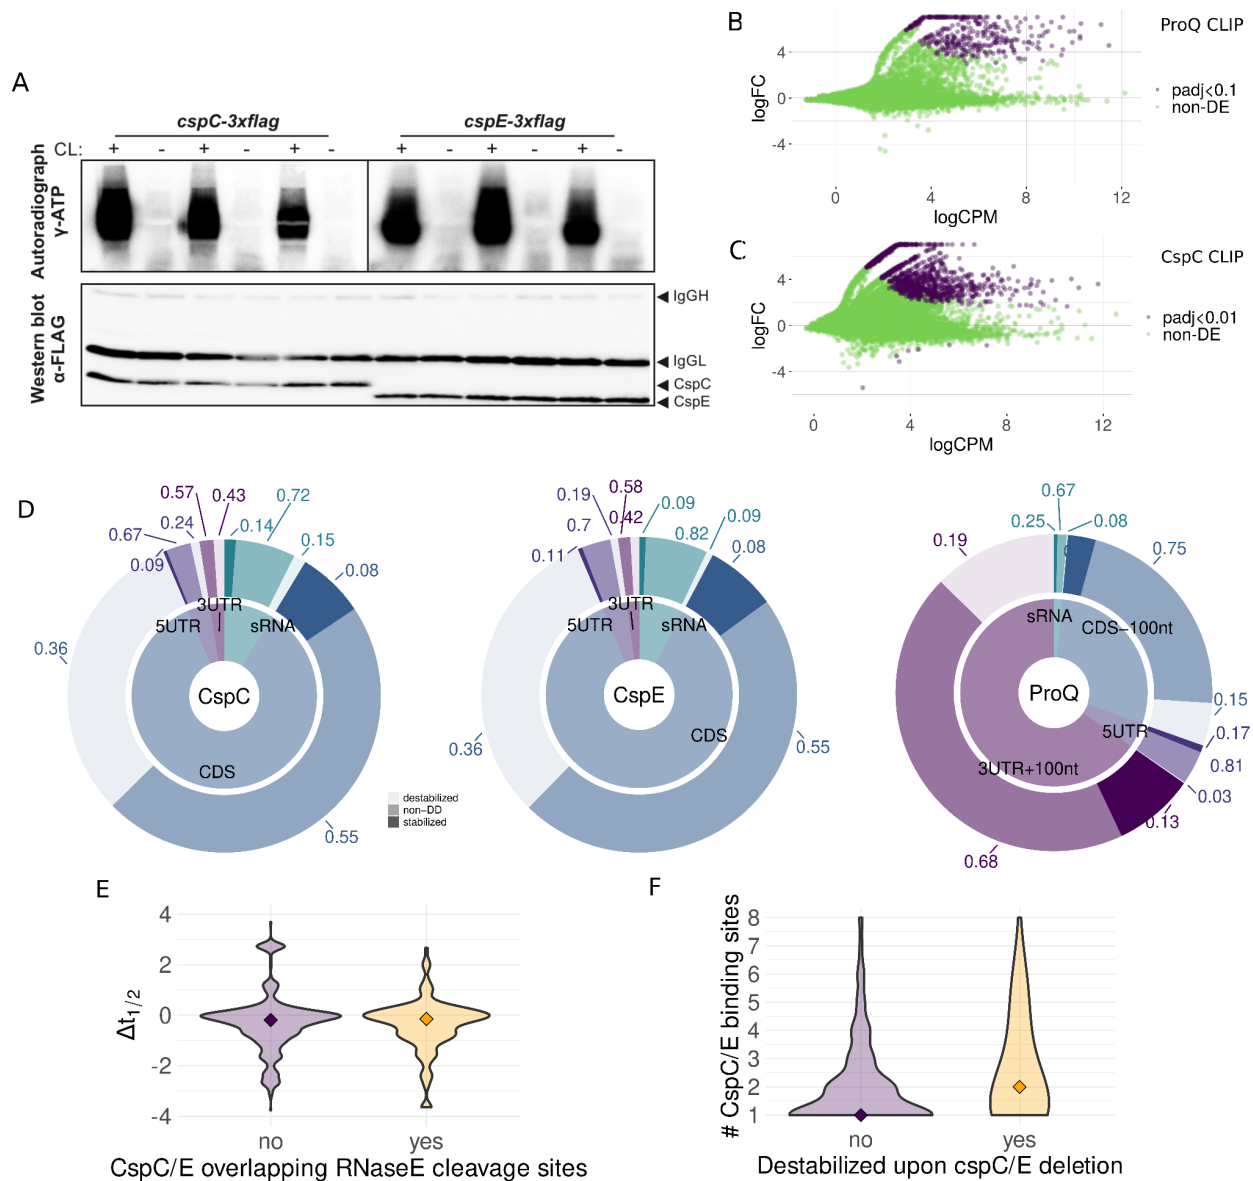

1017  
1018  
1019  
1020  
1021  
1022  
1023  
1024  
1025  
1026  
1027  
1028

**Figure S7. CLIP-seq results and comparison to RIF-seq**

(A) Autoradiograph of radioactively labeled RNA fragments covalently bound by CspC/E after UV cross-linking (CL), immunoprecipitation, gel electrophoresis, and membrane transfer. The presence of the RBPs was verified by western blotting. (B,C) MA plots of the CLIP-seq analysis. (D) Fraction of transcripts bound by CspC/E/ProQ which are (de-)stabilized upon *cspC/E* deletion or which do not decay differentially (non-DD). Peaks which overlap with the CDS and the UTR have been assigned to the CDS only. For ProQ, the region within 100 nt of the stop codon has been analyzed jointly with the 3'UTR. (E) Changes in transcript stability of CspC/E targets categorized by whether or not the binding site overlaps a known RNase E cleavage site (39). (F) Number of CspC/E binding sites per transcripts categorized by whether or not the transcript is destabilized upon *cspC/E* deletion.

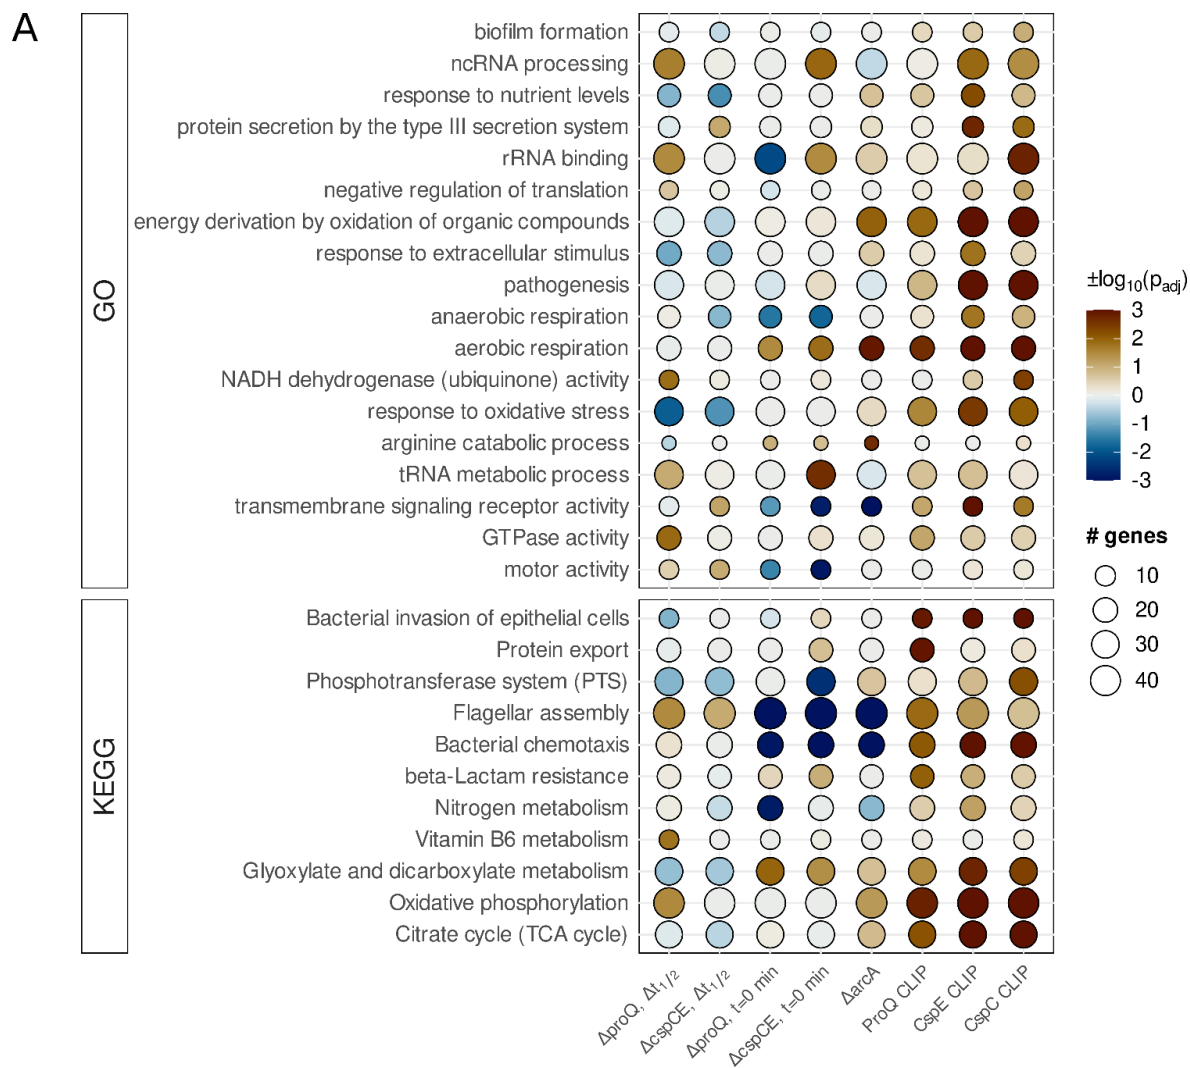

**B** **Transcriptional regulation of bacterial flagellar**

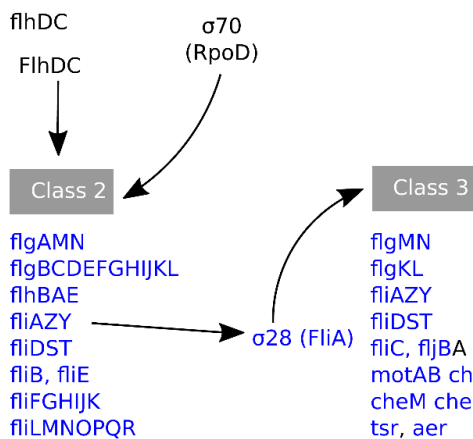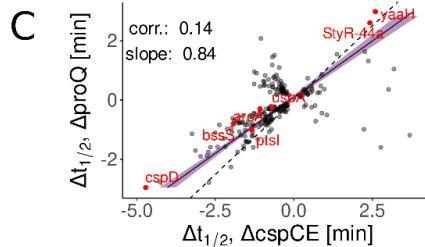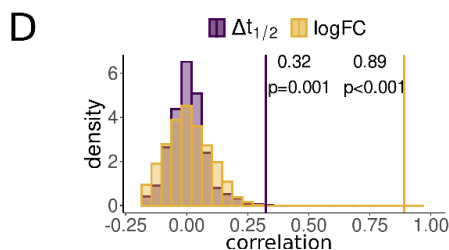

1029  
1030 **Figure S8. Pathway analyses**

1031 (A) Summary of pathway analyses. (B) Transcriptional changes of flagellar genes. Genes highlighted in  
1032 blue are downregulated upon both *proQ* and *cspC/E* deletion (see **Figure S12** for more details). (C)

1033 Correlation between differences in half-life in the  $\Delta proQ$  and  $\Delta cspCE$  strains. Only transcripts significantly  
1034 different in both deletion mutants were considered. The linear regression includes only transcripts with  
1035 changes in the same direction. (D) Significance of correlation between abundance and stability changes  
1036 in the  $\Delta proQ$  and  $\Delta cspCE$  strains.  
1037  
1038  
1039  
1040

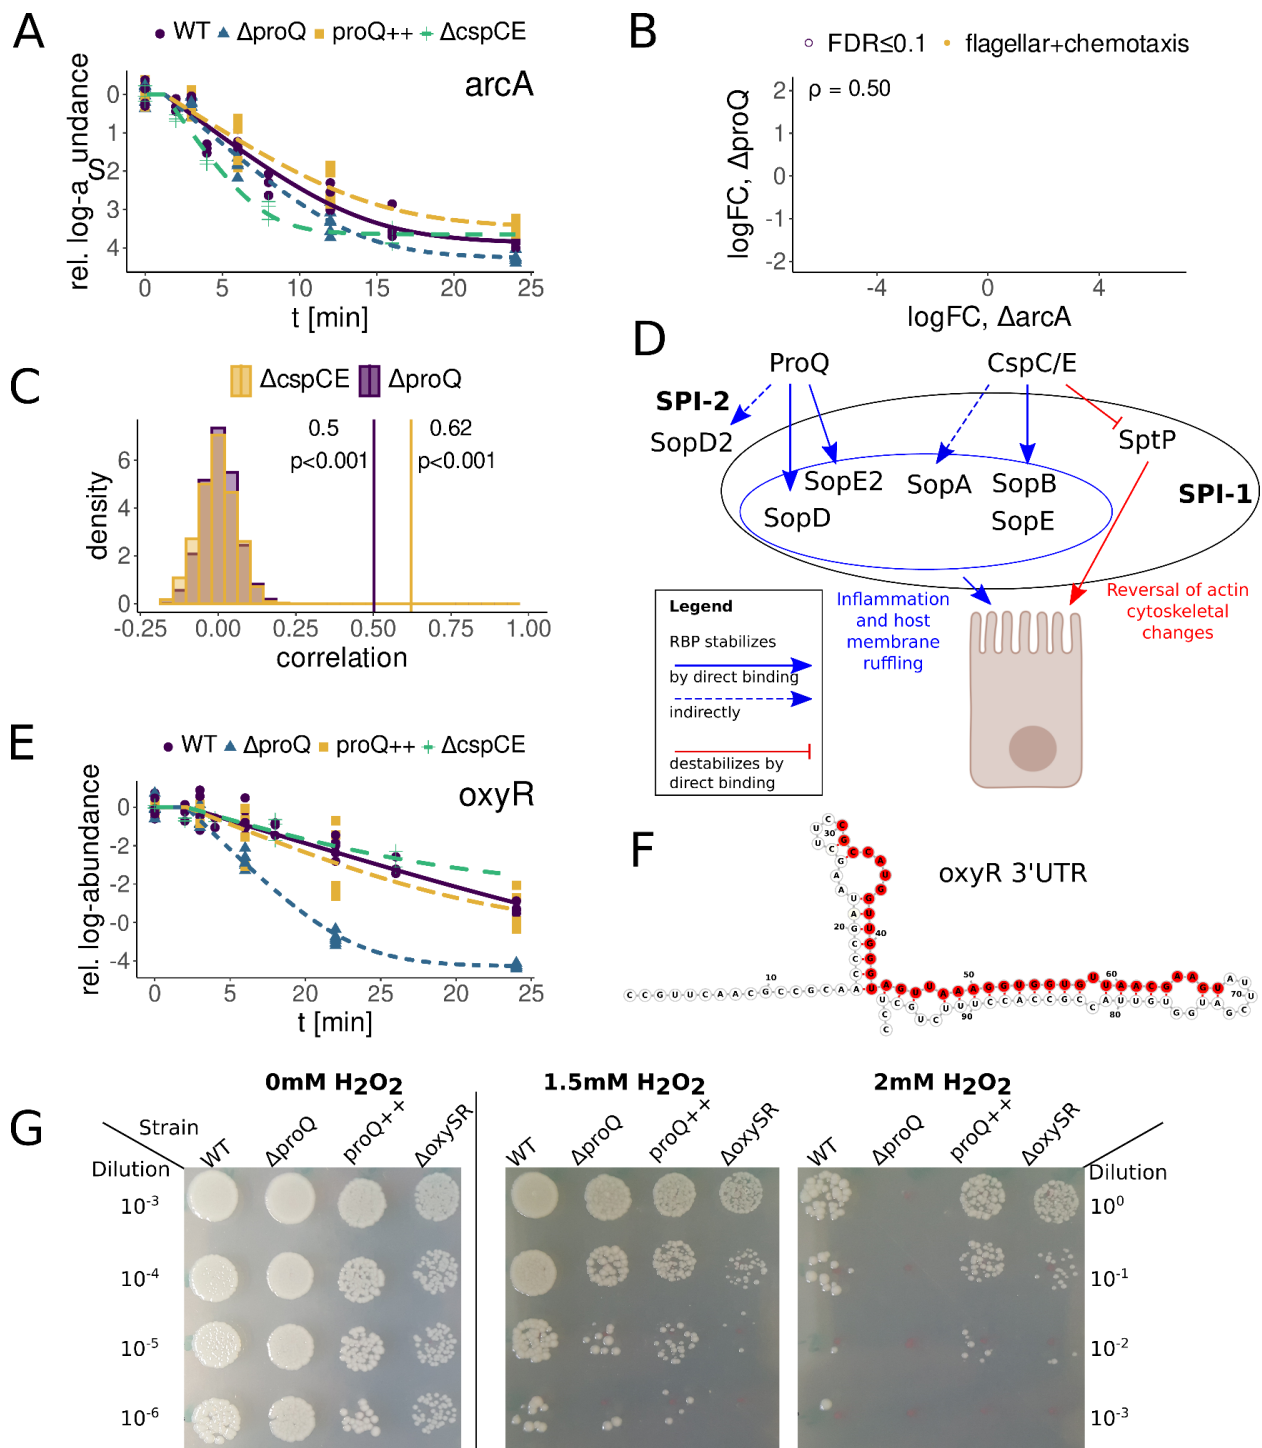

1041  
 1042 **Figure S9. Integrative analysis of RBP binding and transcript stability**  
 1043 (A) Decay curve of significantly destabilized transcript of the *arcA* transcript. (B) log-fold changes in the  
 1044  $\Delta proQ$  vs. a  $\Delta arcA$  strain (44). (C) Significance of correlation between abundance changes in the  
 1045  $\Delta proQ/\Delta cspCE$  and the  $\Delta arcA$  strains. (D) Regulation of SPI-1/2 effectors by ProQ and CspC/E. The  
 1046 picture of the epithelial cell was taken from *BioRender.com*. (E) Decay curve of significantly destabilized  
 1047 transcript of *oxyR*. (F) ProQ CLIP-seq peak in the 3'UTR of *oxyR* identified by re-analyzing (12),  
 1048 FDR=0.047. (G) Exposure of various *Salmonella* strains to varying levels of hydrogen peroxide.



1049

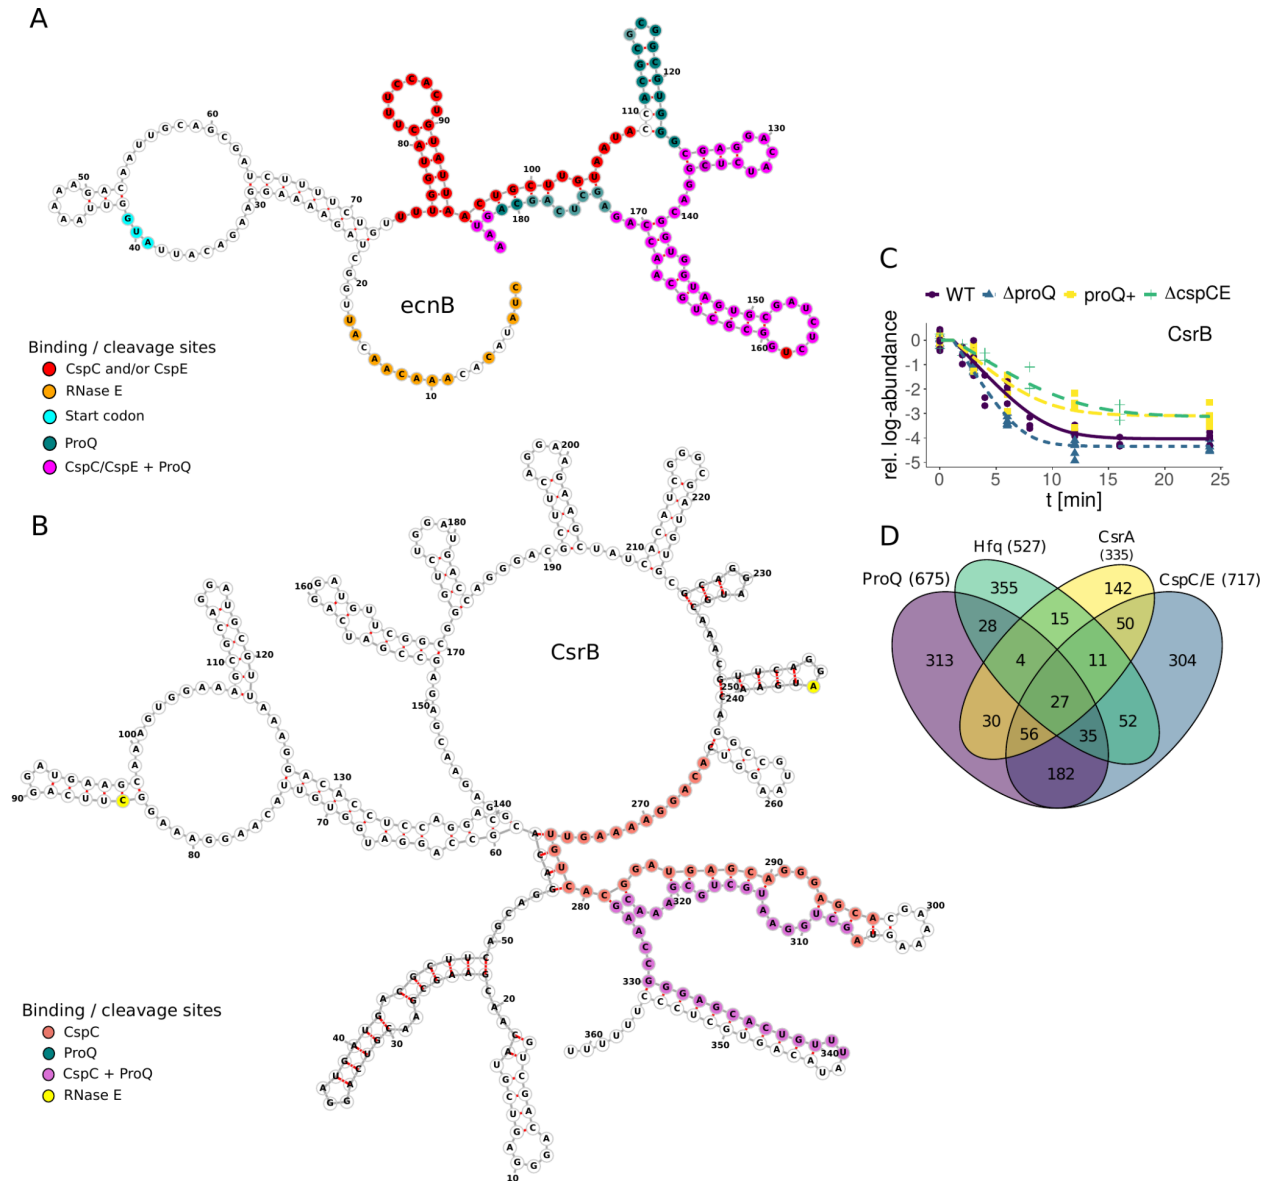

1050

1051

**Figure S10. Integrative analysis of RNA secondary structures**

1052

(A) Secondary structure of the ProQ/CspC/E-bound mRNA of the bacteriolytic lipoprotein EcnB including

1053

RNase E cleavage sites (39). (B) Secondary structure of the ProQ/CspC/E-bound sRNA CsrB including

1054

RNase E cleavage sites (39). (C) Normalized data for CsrB, including the fitted decay curves. (D) Overlap

1055

in interaction partners between various CLIP-seq data sets with major RBPs.

1056

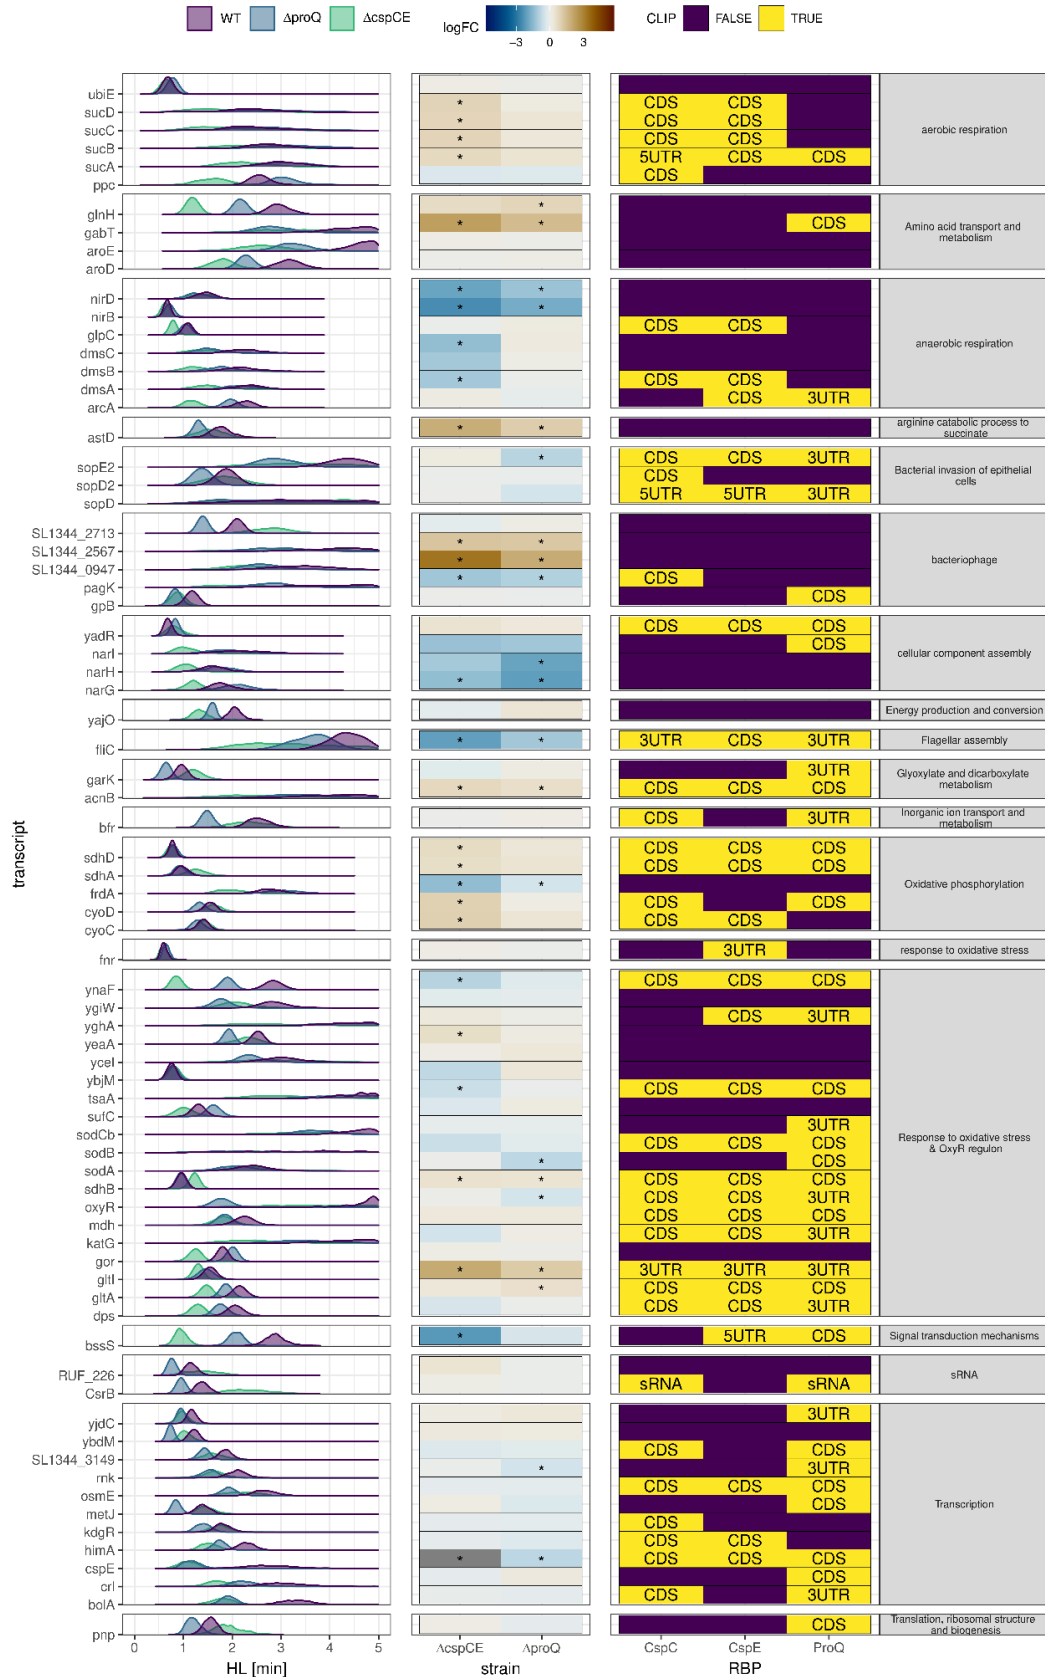

1058 **Figure S11. Top destabilized transcripts in the absence of ProQ and oxidative stress response**

1059

1060

1061

1062

1063

1064

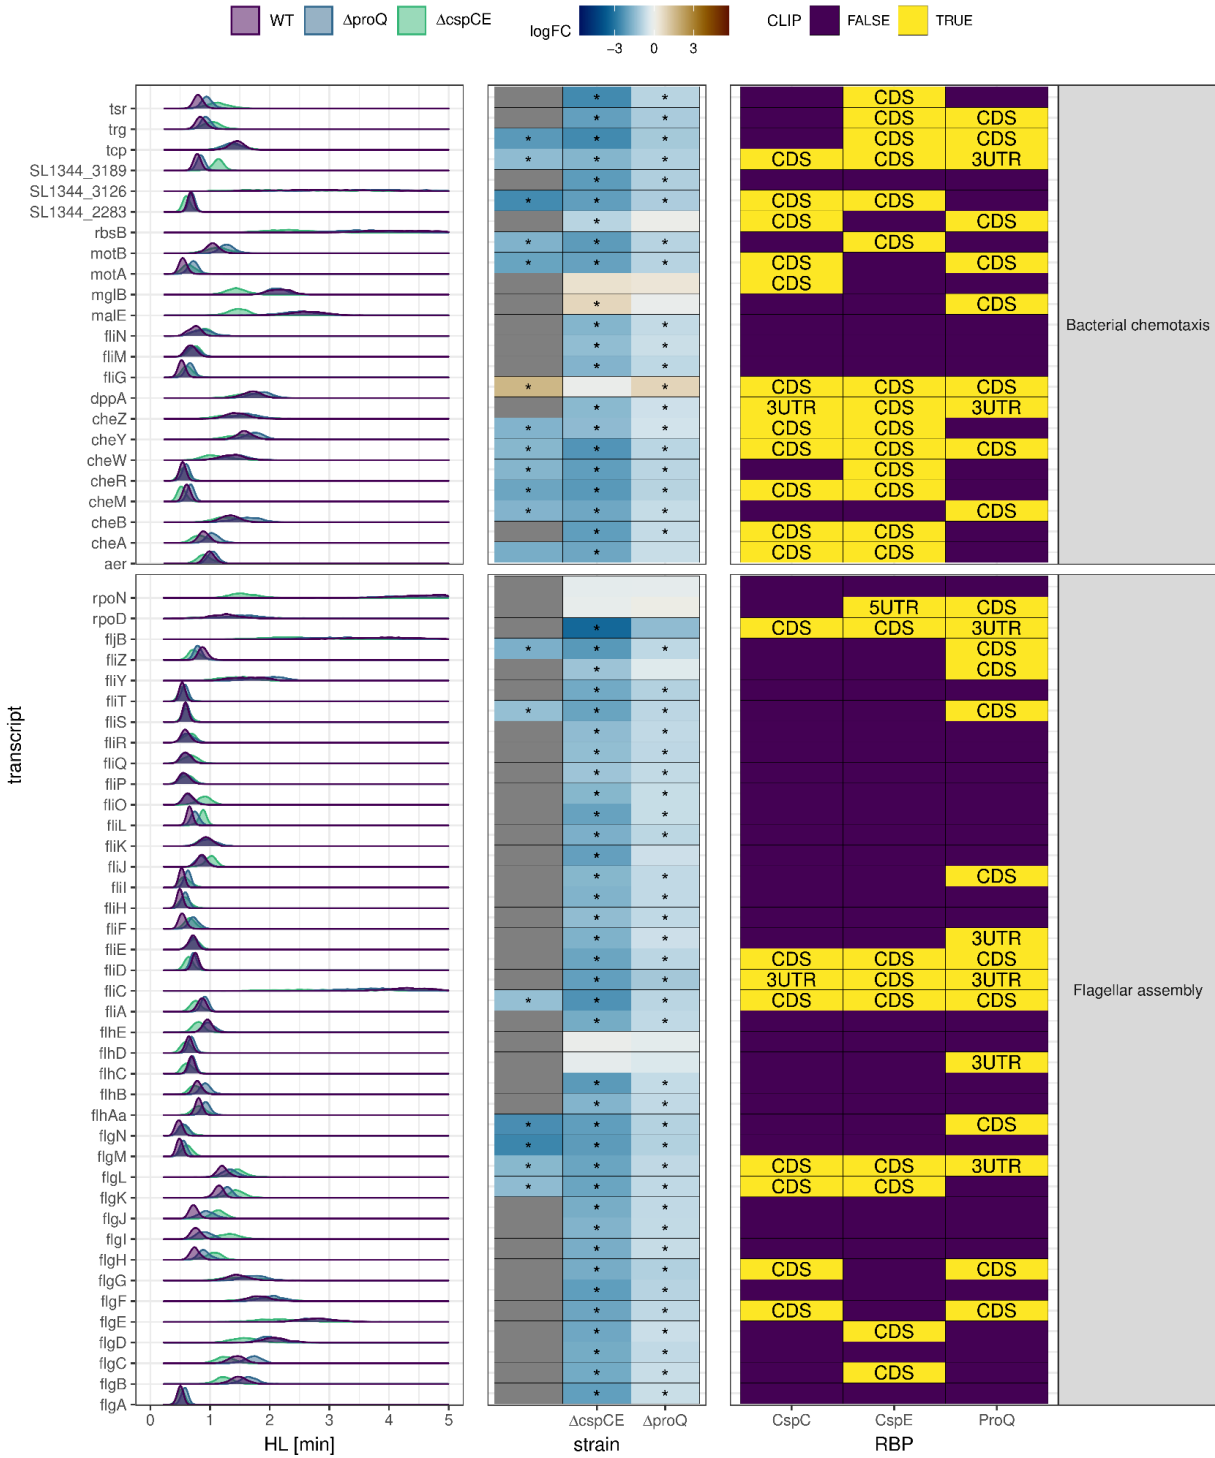

1065  
1066  
1067

**Figure S12. Flagellar genes with negative log-fold change in *proQ* and *cspC/E* deletion strains**

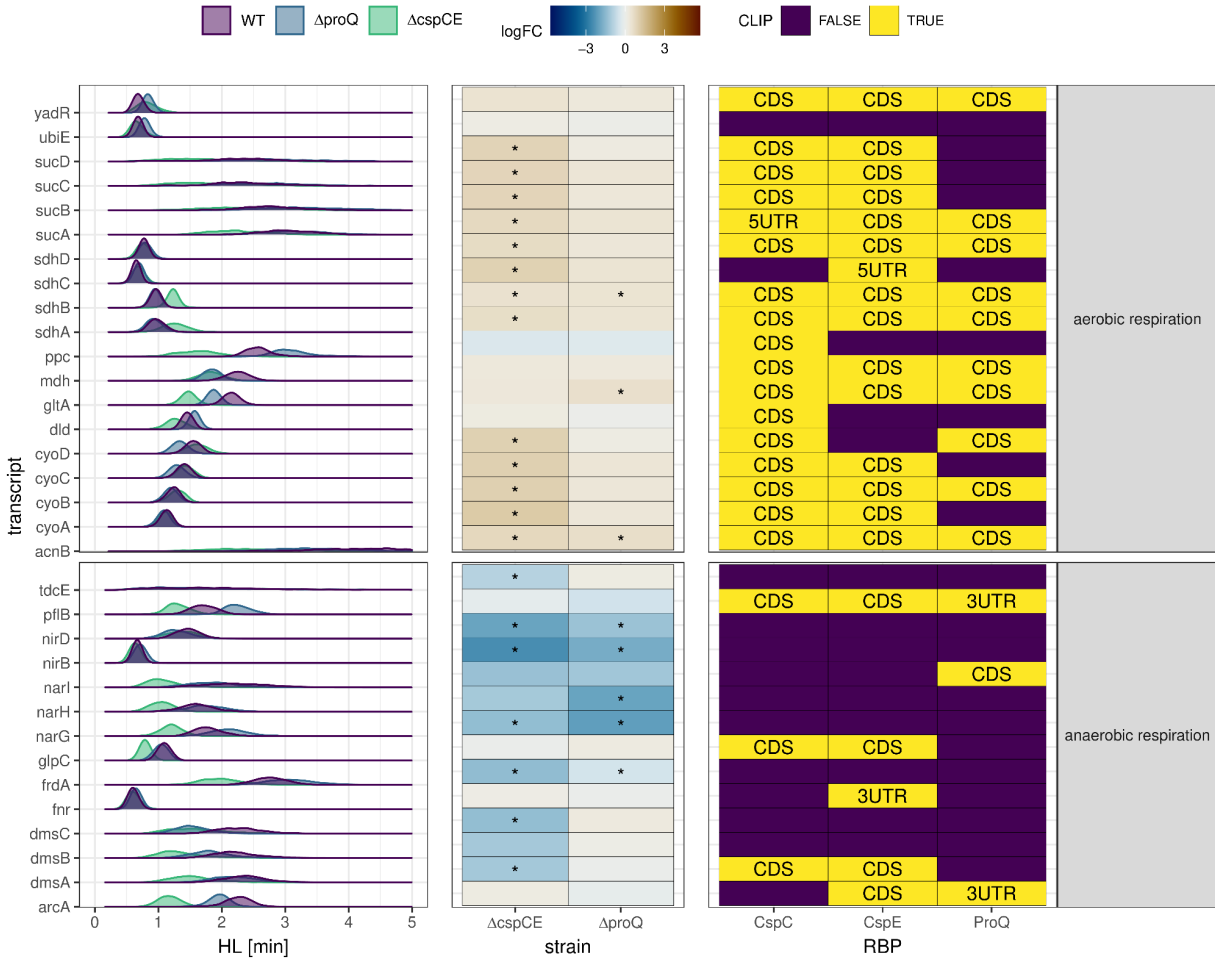

1068  
1069  
1070

**Figure S13. Genes involved in (an)aerobic respiration**

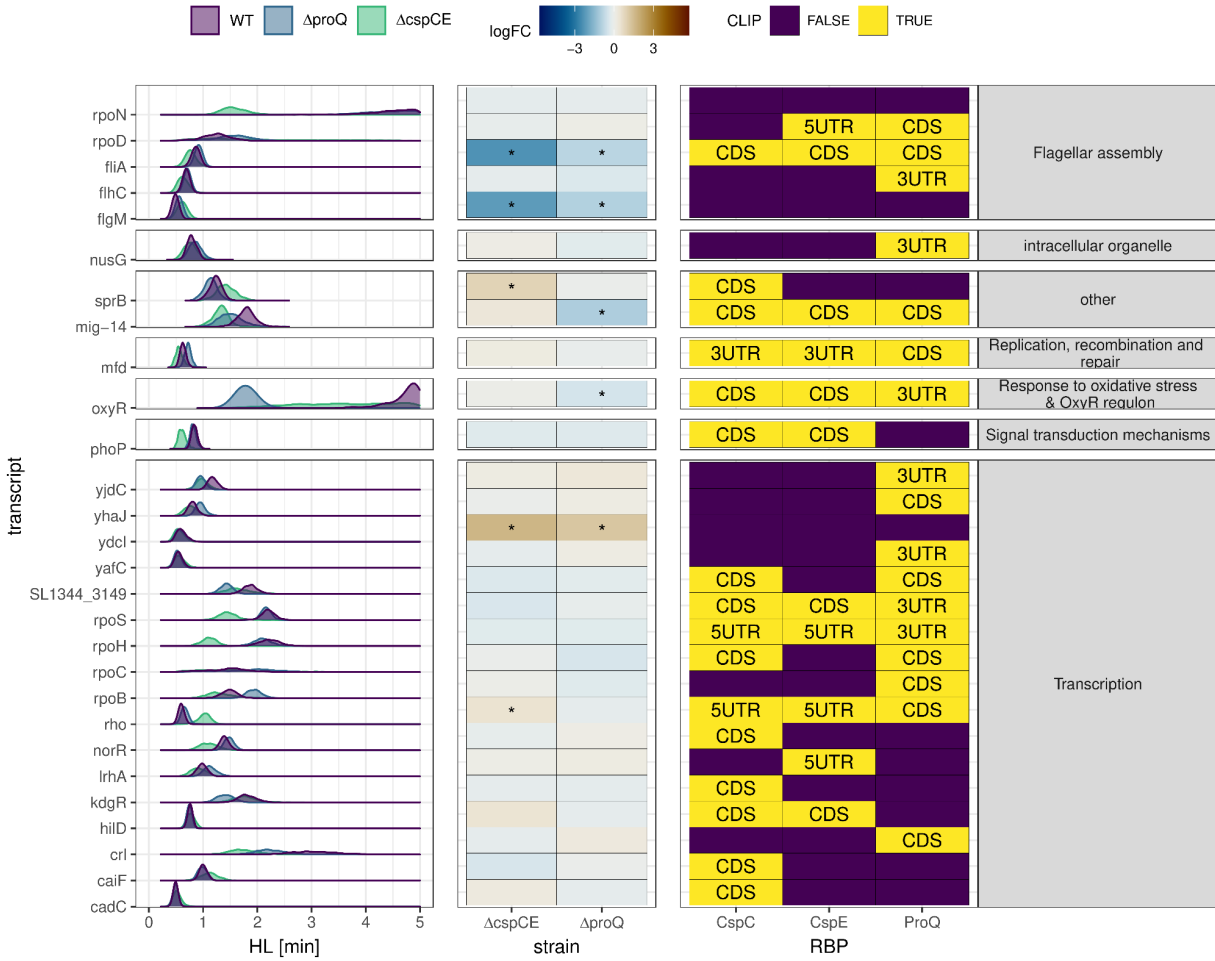

1071  
1072  
1073  
1074  
1075  
1076  
1077  
1078  
1079  
1080  
1081  
1082  
1083  
1084  
1085  
1086  
1087  
1088  
1089

**Figure S14. Transcription factors, subunits of RNA polymerase complex**

## 1090 References

- 1091 1. J. G. Belasco, All things must pass: contrasts and commonalities in eukaryotic and bacterial mRNA decay. *Nat. Rev. Mol. Cell Biol.* **11**, 467–478 (2010).
- 1092
- 1093 2. M. P. Hui, P. L. Foley, J. G. Belasco, Messenger RNA degradation in bacterial cells. *Annu. Rev. Genet.* **48**, 537–559 (2014).
- 1094 3. T. B. Updegrove, A. Zhang, G. Storz, Hfq: the flexible RNA matchmaker. *Curr. Opin. Microbiol.* **30**, 133–138 (2016).
- 1095 4. K. Kavita, F. de Mets, S. Gottesman, New aspects of RNA-based regulation by Hfq and its partner sRNAs. *Curr. Opin. Microbiol.* **42**, 53–61 (2017).
- 1096
- 1097 5. T. Romeo, P. Babitzke, Global Regulation by CsrA and Its RNA Antagonists. *Microbiol Spectr* **6** (2018).
- 1098 6. E. Holmqvist, J. Vogel, RNA-binding proteins in bacteria. *Nat. Rev. Microbiol.* (2018) <https://doi.org/10.1038/s41579-018-0049-5>.
- 1099 7. T. S. Stenum, E. Holmqvist, CsrA enters Hfq's territory: regulation of a base-pairing small RNA. *Mol. Microbiol.* (2021) <https://doi.org/10.1111/mmi.14785>.
- 1100
- 1101 8. T. S. Stenum, *et al.*, RNA interactome capture in Escherichia coli globally identifies RNA-binding proteins. *Nucleic Acids Res.* (2023) <https://doi.org/10.1093/nar/gkad216>.
- 1102
- 1103 9. L.-C. Chu, *et al.*, The RNA-bound proteome of MRSA reveals post-transcriptional roles for helix-turn-helix DNA-binding and Rossmann-fold proteins. *Nat. Commun.* **13**, 2883 (2022).
- 1104
- 1105 10. E. C. Urdaneta, *et al.*, Purification of cross-linked RNA-protein complexes by phenol-toluol extraction. *Nat. Commun.* **10**, 990 (2019).
- 1106
- 1107 11. A. Smirnov, *et al.*, Grad-seq guides the discovery of ProQ as a major small RNA-binding protein. *Proc. Natl. Acad. Sci. U. S. A.* **113**, 11591–11596 (2016).
- 1108
- 1109 12. E. Holmqvist, L. Li, T. Bischler, L. Barquist, J. Vogel, Global Maps of ProQ Binding In Vivo Reveal Target Recognition via RNA Structure and Stability Control at mRNA 3' Ends. *Mol. Cell* **70**, 971–982.e6 (2018).
- 1110
- 1111 13. S. Melamed, P. P. Adams, A. Zhang, H. Zhang, G. Storz, RNA-RNA Interactomes of ProQ and Hfq Reveal Overlapping and Competing Roles. *Mol. Cell* **77**, 411–425.e7 (2020).
- 1112
- 1113 14. A. J. Westermann, *et al.*, The Major RNA-Binding Protein ProQ Impacts Virulence Gene Expression in Salmonella enterica Serovar Typhimurium. *MBio* **10**, e02504–18 (2019).
- 1114
- 1115 15. A. Rizvanovic, *et al.*, The RNA-Binding Protein ProQ Promotes Antibiotic Persistence in Salmonella. *MBio*, e0289122 (2022).
- 1116 16. C. Michaux, *et al.*, RNA target profiles direct the discovery of virulence functions for the cold-shock proteins CspC and CspE. *Proc. Natl. Acad. Sci. U. S. A.*, 201620772 (2017).
- 1117
- 1118 17. S. Ray, R. Da Costa, S. Thakur, D. Nandi, Salmonella Typhimurium encoded cold shock protein E is essential for motility and biofilm formation. *Microbiology* **166**, 460–473 (2020).
- 1119
- 1120 18. S. Bauriedl, *et al.*, The minimal meningococcal ProQ protein has an intrinsic capacity for structure-based global RNA recognition. *Nat. Commun.* **11**, 2823 (2020).
- 1121
- 1122 19. E. A. Campbell, *et al.*, Structural mechanism for rifampicin inhibition of bacterial rna polymerase. *Cell* **104**, 901–912 (2001).
- 1123 20. J. A. Bernstein, A. B. Khodursky, P.-H. Lin, S. Lin-Chao, S. N. Cohen, Global analysis of mRNA decay and abundance in Escherichia coli at single-gene resolution using two-color fluorescent DNA microarrays. *Proc. Natl. Acad. Sci. U. S. A.* **99**, 9697–9702 (2002).
- 1124
- 1125
- 1126 21. D. W. Selinger, R. M. Saxena, K. J. Cheung, G. M. Church, C. Rosenow, Global RNA half-life analysis in Escherichia coli reveals positional patterns of transcript degradation. *Genome Res.* **13**, 216–223 (2003).
- 1127
- 1128 22. H. Chen, K. Shiroguchi, H. Ge, X. S. Xie, Genome-wide study of mRNA degradation and transcript elongation in Escherichia coli. *Mol. Syst. Biol.* **11**, 781 (2015).
- 1129
- 1130 23. M. E. Ritchie, *et al.*, limma powers differential expression analyses for RNA-sequencing and microarray studies. *Nucleic Acids Res.* **43**, e47 (2015).
- 1131
- 1132 24. M. D. Robinson, D. J. McCarthy, G. K. Smyth, edgeR: a Bioconductor package for differential expression analysis of digital gene expression data. *Bioinformatics* **26**, 139–140 (2010).
- 1133
- 1134 25. M. I. Love, W. Huber, S. Anders, Moderated estimation of fold change and dispersion for RNA-seq data with DESeq2. *Genome Biol.* **15**, 550 (2014).
- 1135
- 1136 26. I. Lönnstedt, T. Speed, REPLICATED MICROARRAY DATA. *Stat. Sin.* **12**, 31–46 (2002).

- 1137 27. B. Carpenter, *et al.*, Stan: A probabilistic programming language. *J. Stat. Softw.* **76** (2017).
- 1138 28. C. A. Lee, S. Falkow, The ability of Salmonella to enter mammalian cells is affected by bacterial growth state. *Proc. Natl. Acad. Sci. U. S. A.* **87**, 4304–4308 (1990).
- 1139
- 1140 29. L. Jiang, *et al.*, Synthetic spike-in standards for RNA-seq experiments. *Genome Res.* **21**, 1543–1551 (2011).
- 1141 30. R. D. Mosteller, C. Yanofsky, Transcription of the tryptophan operon in Escherichia coli: rifampicin as an inhibitor of initiation. *J. Mol. Biol.* **48**, 525–531 (1970).
- 1142
- 1143 31. D. Dar, R. Sorek, Bacterial Noncoding RNAs Excised from within Protein-Coding Transcripts. *MBio* **9** (2018).
- 1144 32. A. Vehtari, A. Gelman, J. Gabry, Practical Bayesian model evaluation using leave-one-out cross-validation and WAIC. *Stat. Comput.* **27**, 1413–1432 (2017).
- 1145
- 1146 33. M. Y. Galperin, *et al.*, COG database update: focus on microbial diversity, model organisms, and widespread pathogens. *Nucleic Acids Res.* **49**, D274–D281 (2021).
- 1147
- 1148 34. A. Vehtari, J. Ojanen, A survey of Bayesian predictive methods for model assessment, selection and comparison. *Stat. Surv.* **6**, 142–228 (2012).
- 1149
- 1150 35. A. Gelman, Two simple examples for understanding posterior p-values whose distributions are far from uniform. *EJSS* **7**, 2595–2602 (2013).
- 1151
- 1152 36. Y. Yair, *et al.*, Cellular RNA Targets of Cold Shock Proteins CspC and CspE and Their Importance for Serum Resistance in Septicemic Escherichia coli. *mSystems* **7**, e0008622 (2022).
- 1153
- 1154 37. M. Raffatellu, *et al.*, SipA, SopA, SopB, SopD, and SopE2 contribute to Salmonella enterica serotype typhimurium invasion of epithelial cells. *Infect. Immun.* **73**, 146–154 (2005).
- 1155
- 1156 38. J. A. Imlay, Transcription Factors That Defend Bacteria Against Reactive Oxygen Species. *Annu. Rev. Microbiol.* **69**, 93–108 (2015).
- 1157
- 1158 39. Y. Chao, *et al.*, In Vivo Cleavage Map Illuminates the Central Role of RNase E in Coding and Non-coding RNA Pathways. *Mol. Cell* **65**, 39–51 (2017).
- 1159
- 1160 40. J. Richards, J. G. Belasco, Obstacles to Scanning by RNase E Govern Bacterial mRNA Lifetimes by Hindering Access to Distal Cleavage Sites. *Mol. Cell* (2019) <https://doi.org/10.1016/j.molcel.2019.01.044>.
- 1161
- 1162 41. J. Richards, J. G. Belasco, Graded impact of obstacle size on scanning by RNase E. *Nucleic Acids Res.* **51**, 1364–1374 (2023).
- 1163 42. E. Holmqvist, *et al.*, Global RNA recognition patterns of post-transcriptional regulators Hfq and CsrA revealed by UV crosslinking in vivo. *EMBO J.* **35**, 991–1011 (2016).
- 1164
- 1165 43. A. Subramanian, *et al.*, Gene set enrichment analysis: a knowledge-based approach for interpreting genome-wide expression profiles. *Proc. Natl. Acad. Sci. U. S. A.* **102**, 15545–15550 (2005).
- 1166
- 1167 44. M. R. Evans, *et al.*, Analysis of the ArcA regulon in anaerobically grown Salmonella enterica sv. Typhimurium. *BMC Microbiol.* **11**, 58 (2011).
- 1168
- 1169 45. M. Scott, C. W. Gunderson, E. M. Mateescu, Z. Zhang, T. Hwa, Interdependence of cell growth and gene expression: origins and consequences. *Science* **330**, 1099–1102 (2010).
- 1170
- 1171 46. T. Esquerré, *et al.*, Dual role of transcription and transcript stability in the regulation of gene expression in Escherichia coli cells cultured on glucose at different growth rates. *Nucleic Acids Res.* **42**, 2460–2472 (2014).
- 1172
- 1173 47. A. H. Potts, Y. Guo, B. M. M. Ahmer, T. Romeo, Role of CsrA in stress responses and metabolism important for Salmonella virulence revealed by integrated transcriptomics. *PLoS One* **14**, e0211430 (2019).
- 1174
- 1175 48. Morin Manon, Enjalbert Brice, Ropers Delphine, Girbal Laurence, Coccagn-Bousquet Muriel, Genomewide Stabilization of mRNA during a “Feast-to-Famine” Growth Transition in Escherichia coli. *mSphere* **5**, e00276–20 (2020).
- 1176
- 1177 49. E. Baracchini, H. Bremer, Determination of synthesis rate and lifetime of bacterial mRNAs. *Anal. Biochem.* **167**, 245–260 (1987).
- 1178
- 1179 50. D. A. Vargas-Blanco, S. S. Shell, Regulation of mRNA Stability During Bacterial Stress Responses. *Front. Microbiol.* **11**, 2111 (2020).
- 1180
- 1181 51. G. Yim, F. de la Cruz, G. B. Spiegelman, J. Davies, Transcription modulation of Salmonella enterica serovar Typhimurium promoters by sub-MIC levels of rifampin. *J. Bacteriol.* **188**, 7988–7991 (2006).
- 1182
- 1183 52. E. Massé, F. E. Escorcia, S. Gottesman, Coupled degradation of a small regulatory RNA and its mRNA targets in Escherichia coli. *Genes Dev.* **17**, 2374–2383 (2003).
- 1184



- 1185 53. Y. Zhang, *et al.*, A Stress Response that Monitors and Regulates mRNA Structure Is Central to Cold Shock Adaptation. *Mol. Cell* (2018) <https://doi.org/10.1016/j.molcel.2018.02.035>.  
1186
- 1187 54. W. Bae, B. Xia, M. Inouye, K. Severinov, Escherichia coli CspA-family RNA chaperones are transcription antiterminators. *Proc. Natl. Acad. Sci. U. S. A.* **97**, 7784–7789 (2000).  
1188
- 1189 55. A. Smirnov, C. Wang, L. L. Drewry, J. Vogel, Molecular mechanism of mRNA repression intrinsically by a ProQ-dependent small RNA. *EMBO J.* **36**, 1029–1045 (2017).  
1190
- 1191 56. R. Balakrishnan, *et al.*, Principles of gene regulation quantitatively connect DNA to RNA and proteins in bacteria. *Science* **378**, eabk2066 (2022).  
1192
- 1193 57. Y. Chao, J. Vogel, The role of Hfq in bacterial pathogens. *Curr. Opin. Microbiol.* **13**, 24–33 (2010).
- 1194 58. M. G. Jørgensen, M. K. Thomason, J. Havelund, P. Valentin-Hansen, G. Storz, Dual function of the McaS small RNA in controlling biofilm formation. *Genes Dev.* **27**, 1132–1145 (2013).  
1195
- 1196 59. Y.-J. Lai, *et al.*, CsrA regulation via binding to the base-pairing small RNA Spot 42. *Mol. Microbiol.* **117**, 32–53 (2022).
- 1197 60. B. Xia, H. Ke, M. Inouye, Acquisition of cold sensitivity by quadruple deletion of the cspA family and its suppression by PNPase S1 domain in Escherichia coli. *Mol. Microbiol.* **40**, 179–188 (2001).  
1198
- 1199 61. B. A. Stocker, S. K. Hoiseth, B. P. Smith, Aromatic-dependent “Salmonella sp.” as live vaccine in mice and calves. *Dev. Biol. Stand.* **53**, 47–54 (1983).  
1200
- 1201 62. K. A. Datsenko, B. L. Wanner, One-step inactivation of chromosomal genes in Escherichia coli K-12 using PCR products. *Proc. Natl. Acad. Sci. U. S. A.* **97**, 6640–6645 (2000).  
1202
- 1203 63. A. Dobin, *et al.*, STAR: ultrafast universal RNA-seq aligner. *Bioinformatics* **29**, 15–21 (2013).
- 1204 64. C. Kröger, *et al.*, An infection-relevant transcriptomic compendium for Salmonella enterica Serovar Typhimurium. *Cell Host Microbe* **14**, 683–695 (2013).  
1205
- 1206 65. P. P. Gardner, L. Barquist, A. Bateman, E. P. Nawrocki, Z. Weinberg, RNIE: genome-wide prediction of bacterial intrinsic terminators. *Nucleic Acids Res.* **39**, 5845–5852 (2011).  
1207
- 1208 66. D. Risso, J. Ngai, T. P. Speed, S. Dudoit, Normalization of RNA-seq data using factor analysis of control genes or samples. *Nat. Biotechnol.* **32**, 896–902 (2014).  
1209
- 1210 67. A. R. Gruber, R. Lorenz, S. H. Bernhart, R. Neuböck, I. L. Hofacker, The Vienna RNA websuite. *Nucleic Acids Res.* **36**, W70–4 (2008).  
1211
- 1212 68. P. Kerpedjiev, S. Hammer, I. L. Hofacker, Forna (force-directed RNA): Simple and effective online RNA secondary structure diagrams. *Bioinformatics* **31**, 3377–3379 (2015).  
1213
- 1214 69. J. Huerta-Cepas, *et al.*, eggNOG 5.0: a hierarchical, functionally and phylogenetically annotated orthology resource based on 5090 organisms and 2502 viruses. *Nucleic Acids Res.* **47**, D309–D314 (2019).  
1215
- 1216 70. D. Binns, *et al.*, QuickGO: a web-based tool for Gene Ontology searching. *Bioinformatics* **25**, 3045–3046 (2009).
- 1217 71. M. Kanehisa, Y. Sato, M. Kawashima, M. Furumichi, M. Tanabe, KEGG as a reference resource for gene and protein annotation. *Nucleic Acids Res.* **44**, D457–62 (2016).  
1218
- 1219 72. M. Lechner, *et al.*, Orthology detection combining clustering and synteny for very large datasets. *PLoS One* **9**, e105015 (2014).
- 1220 73. H. Xu, *et al.*, FastUniq: a fast de novo duplicates removal tool for paired short reads. *PLoS One* **7**, e52249 (2012).
- 1221 74. M. Martin, Cutadapt removes adapter sequences from high-throughput sequencing reads. *EMBnet.journal* **17**, 10–12 (2011).
- 1222 75. S. Hoffmann, *et al.*, A multi-split mapping algorithm for circular RNA, splicing, trans-splicing and fusion detection. *Genome Biol.* **15**, R34 (2014).  
1223
- 1224 76. A. Zhu, J. G. Ibrahim, M. I. Love, Heavy-tailed prior distributions for sequence count data: removing the noise and preserving large differences. *Bioinformatics* **35**, 2084–2092 (2018).  
1225
- 1226
